# Supplementary material
Source: PubMed Central journal article supplement (PMC2732430)
Supplement: NIHMS63560-supplement-22.pdf [file NIHMS63560-supplement-22.pdf]

**Synthesis of Substituted 1,4-Dienes by  
Direct Alkylation of Allylic Alcohols**

**SUPPORTING INFORMATION—2:**

**Spectral Data for Compounds 8-49**

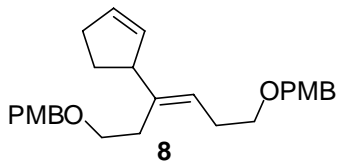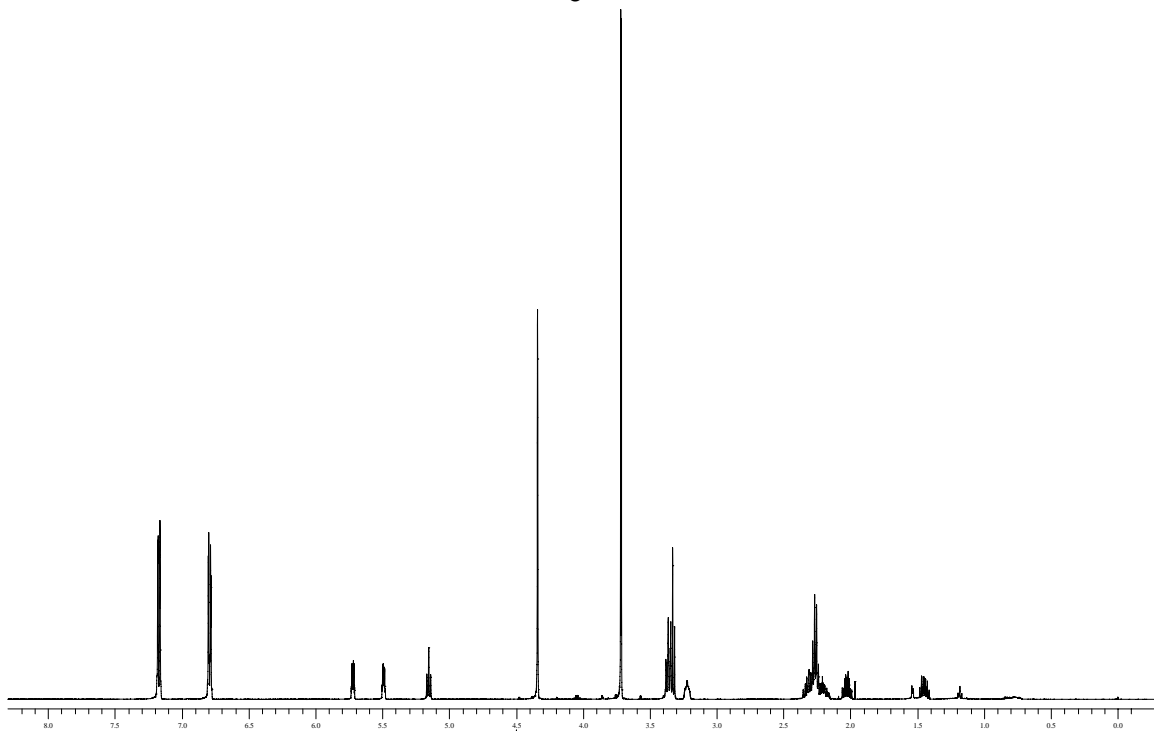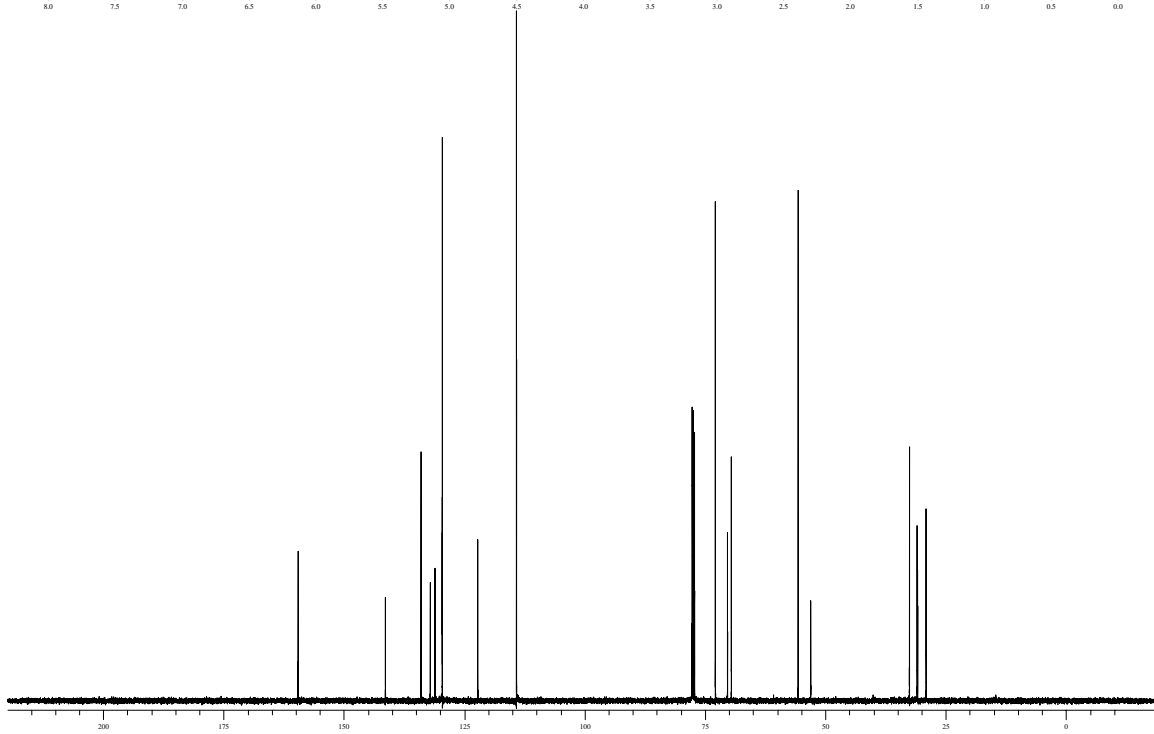

<sup>1</sup>H NMR (500 MHz) and <sup>13</sup>C NMR (126 MHz) of compound **8** (CDCl<sub>3</sub>)

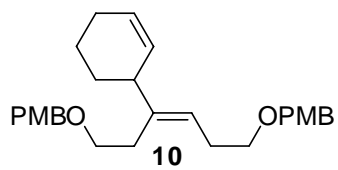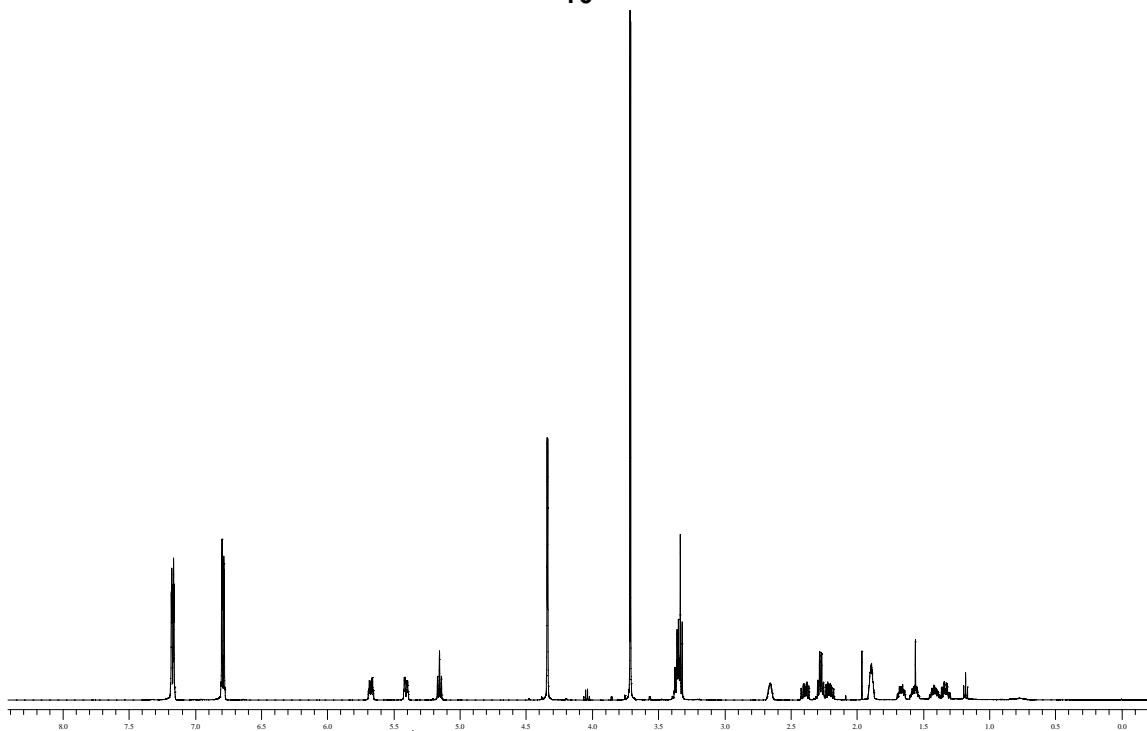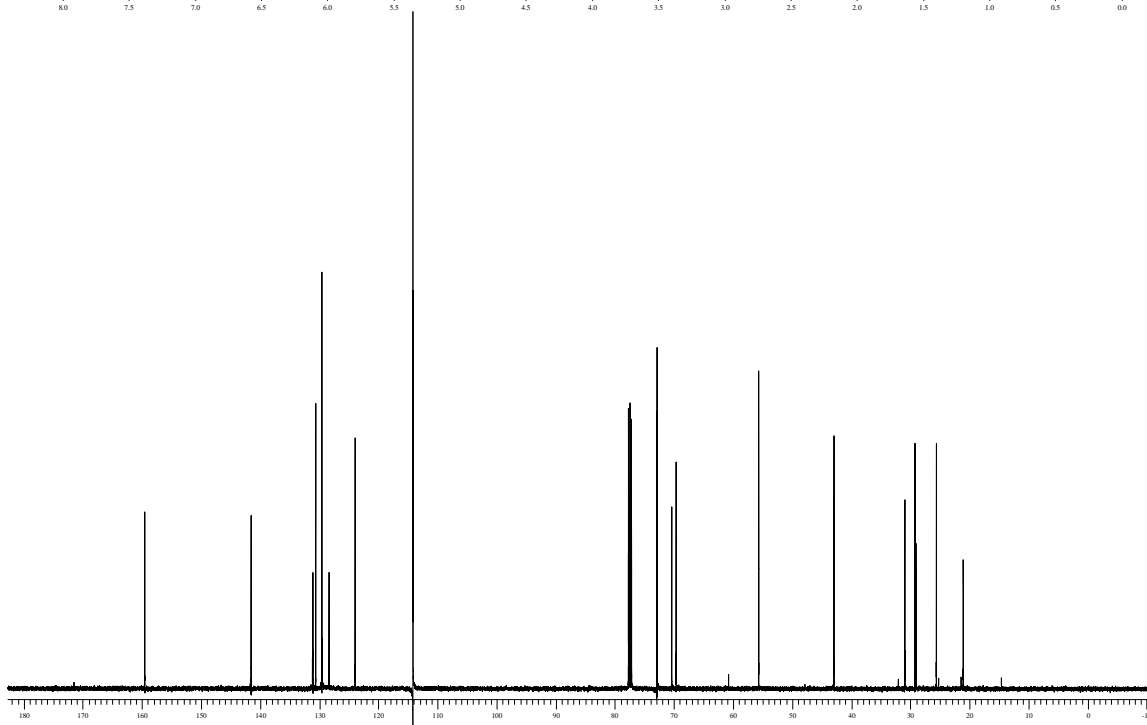

$^1\text{H}$  NMR (500 MHz) and  $^{13}\text{C}$  NMR (126 MHz) of compound **10** ( $\text{CDCl}_3$ )

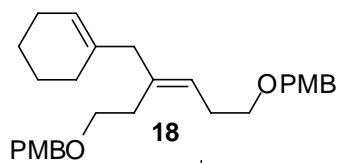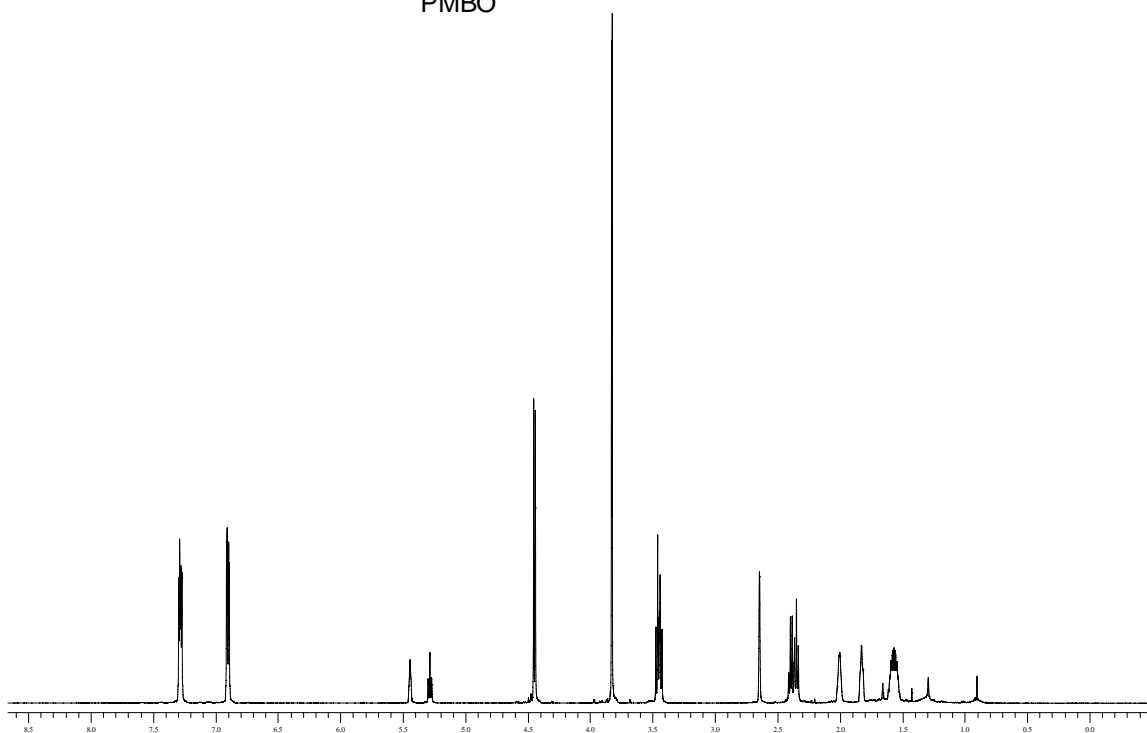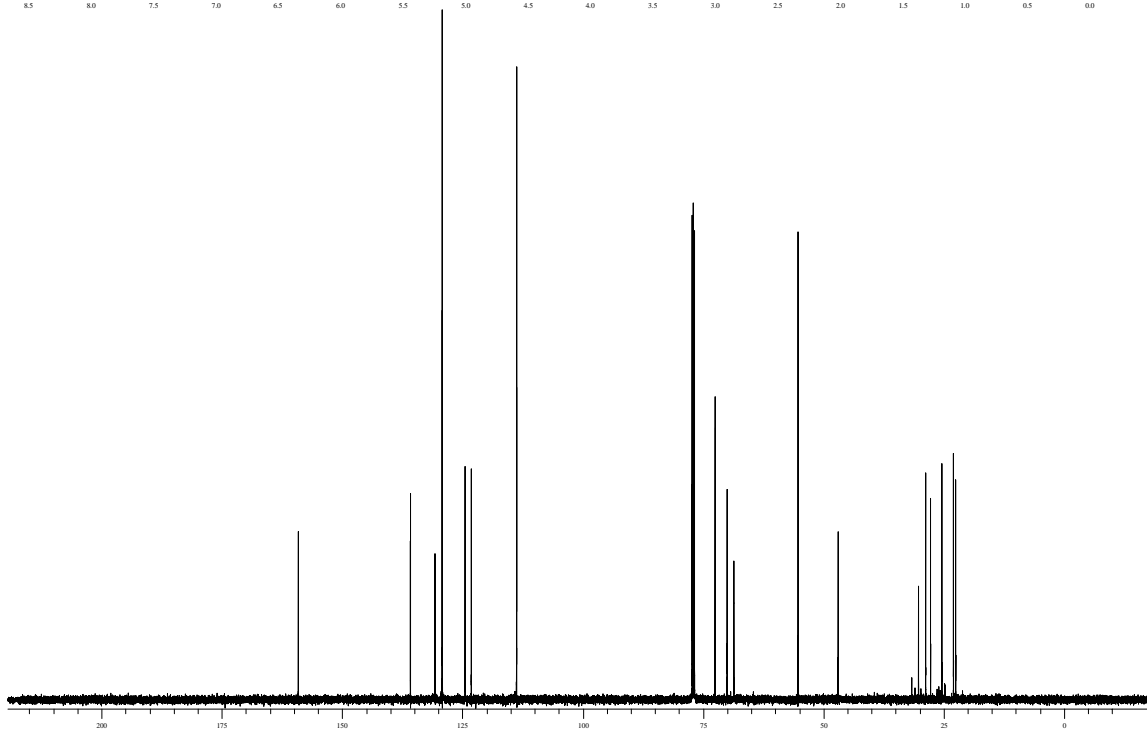

$^1\text{H}$  NMR (500 MHz) and  $^{13}\text{C}$  NMR (126 MHz) of compound **18** ( $\text{CDCl}_3$ )

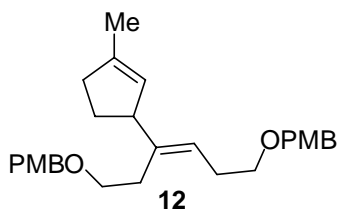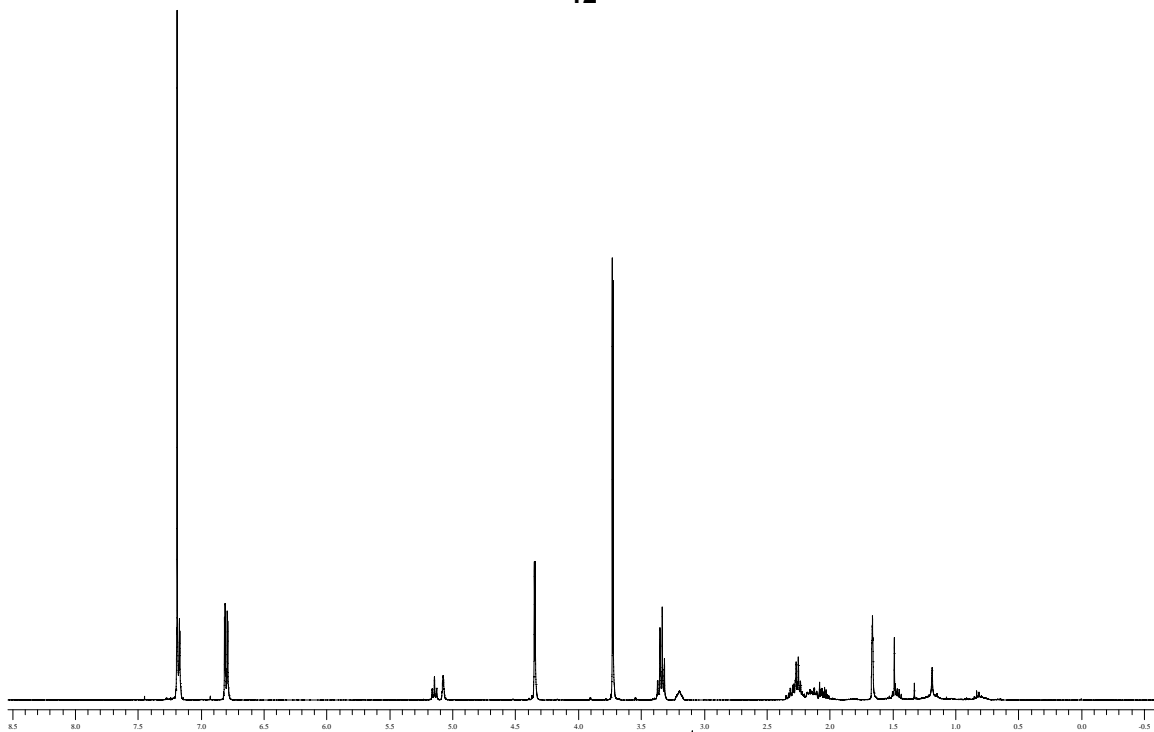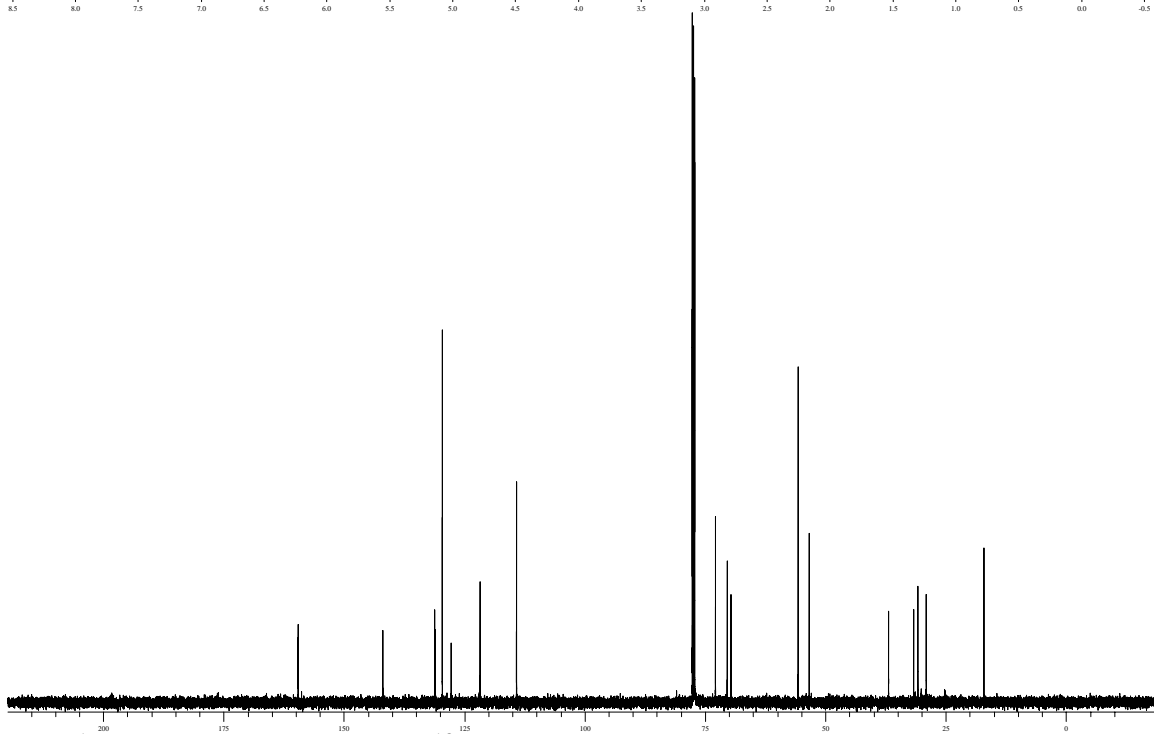

$^1\text{H}$  NMR (500 MHz) and  $^{13}\text{C}$  NMR (126 MHz) of compound **12** ( $\text{CDCl}_3$ )

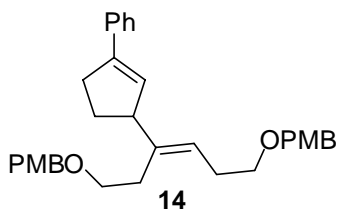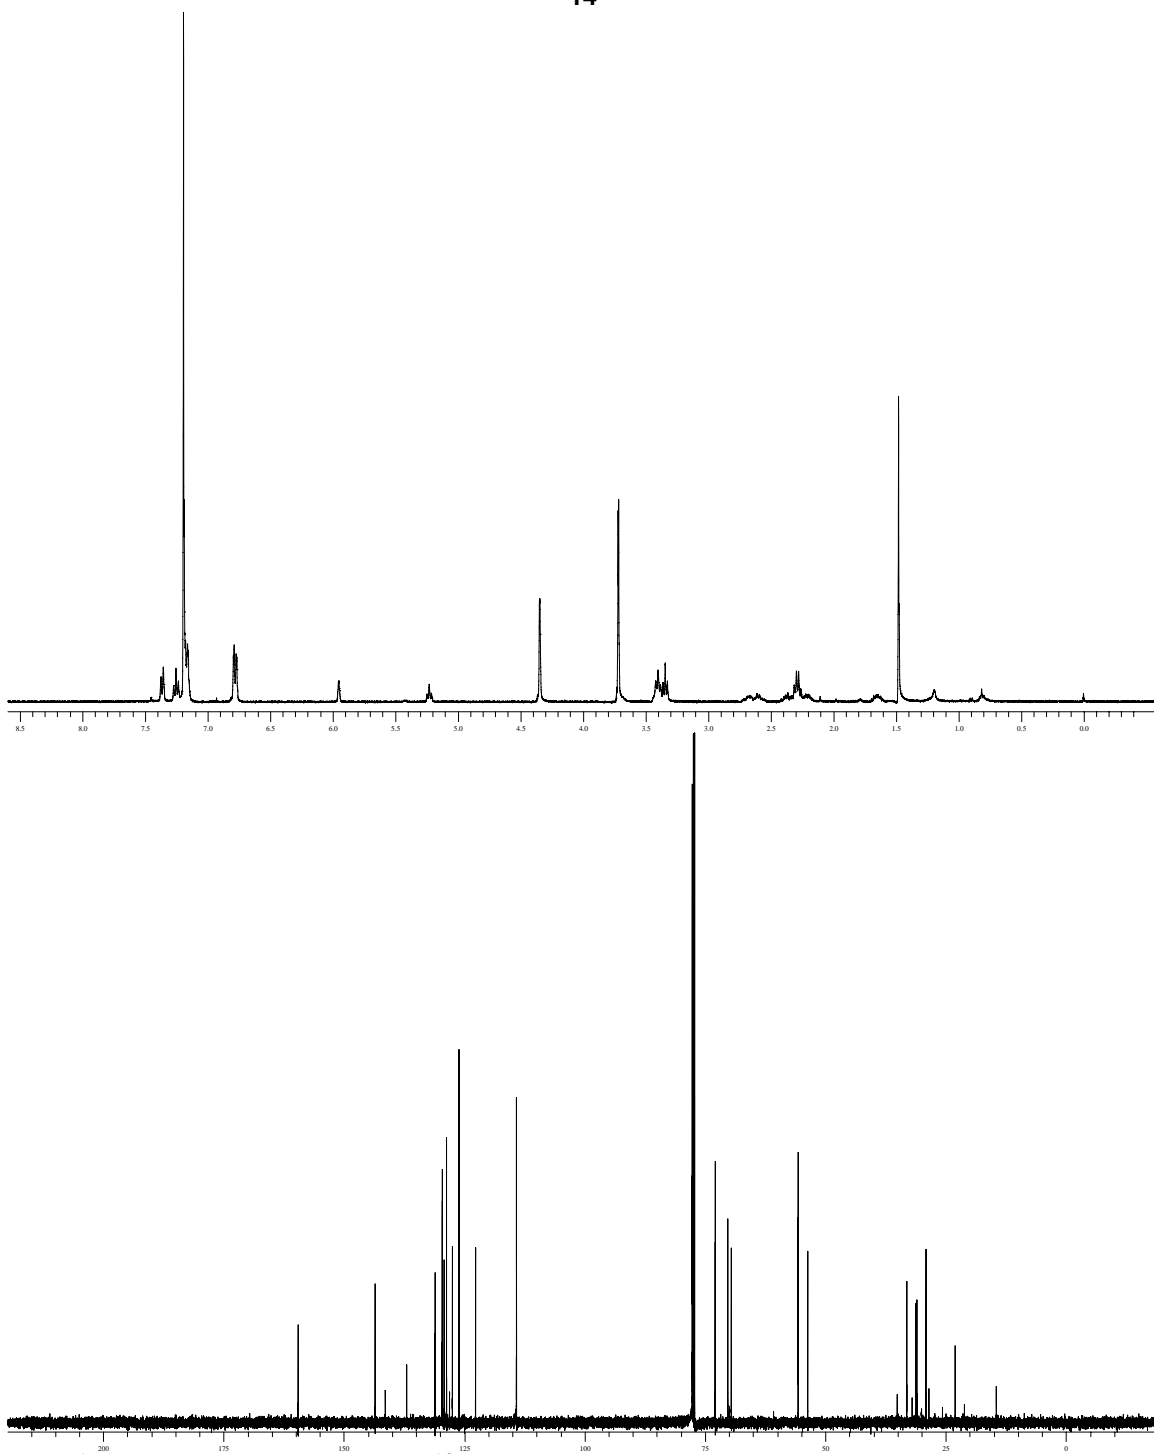

$^1\text{H}$  NMR (400 MHz) and  $^{13}\text{C}$  NMR (126 MHz) of compound **14** ( $\text{CDCl}_3$ )

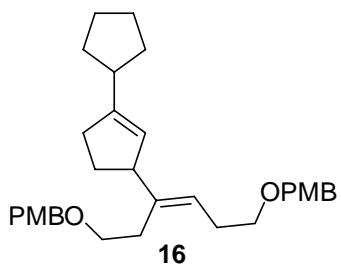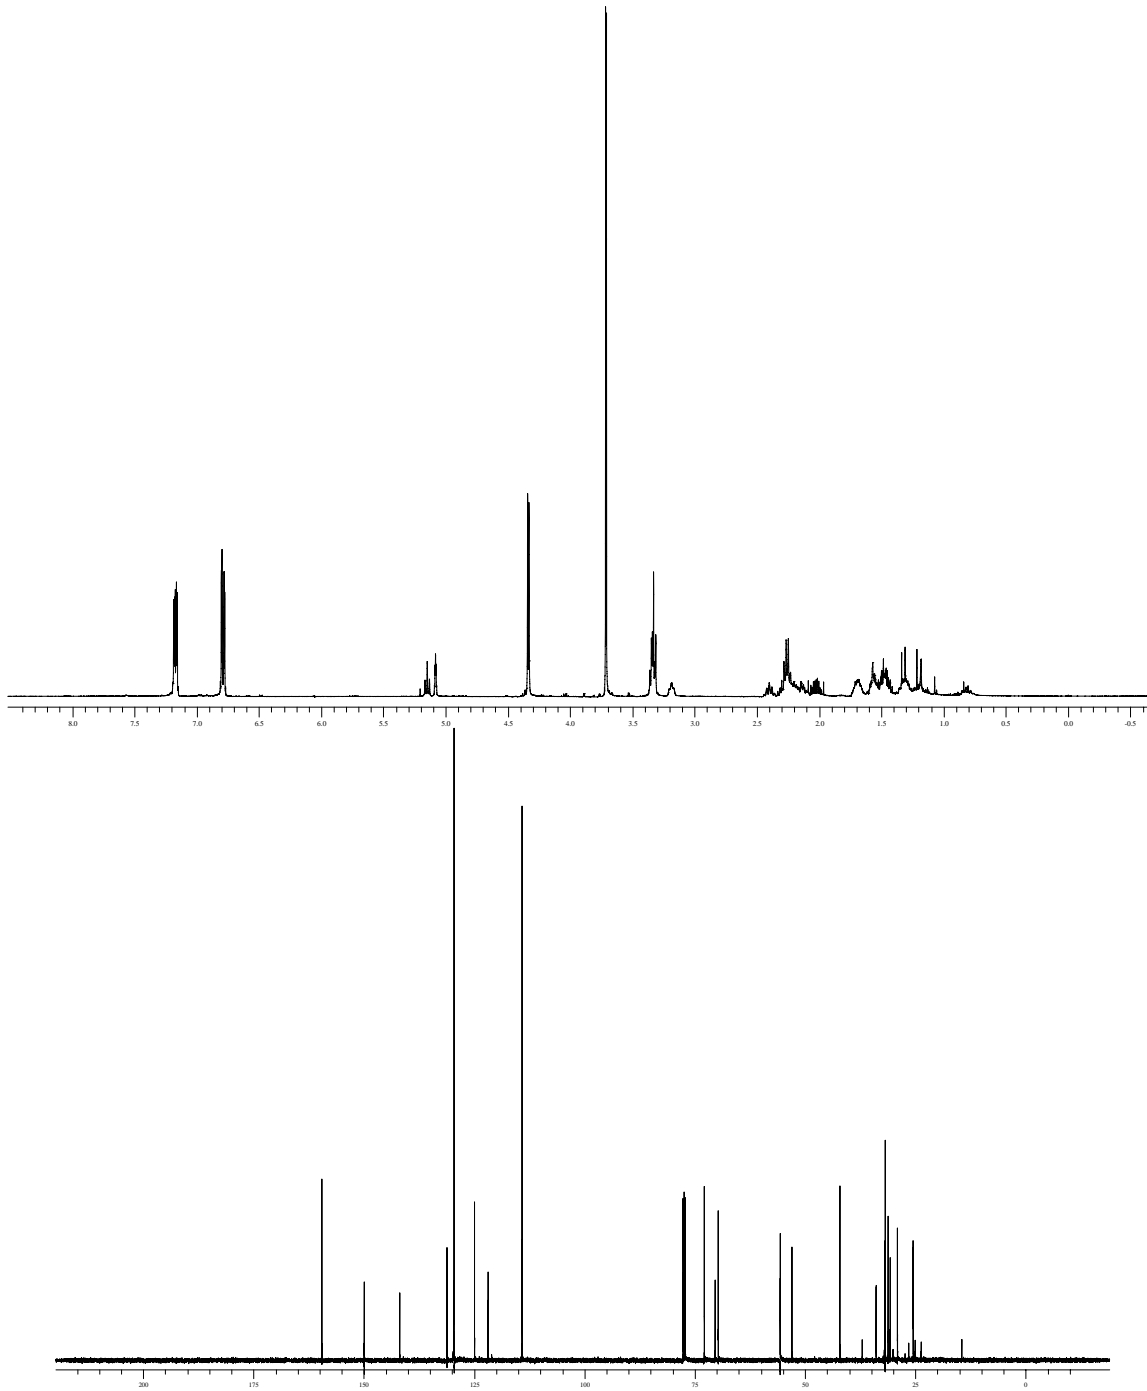

$^1\text{H}$  NMR (500 MHz) and  $^{13}\text{C}$  NMR (126 MHz) of compound **16** ( $\text{CDCl}_3$ )

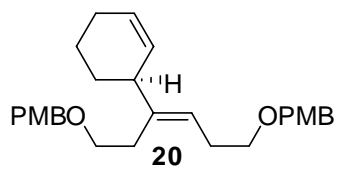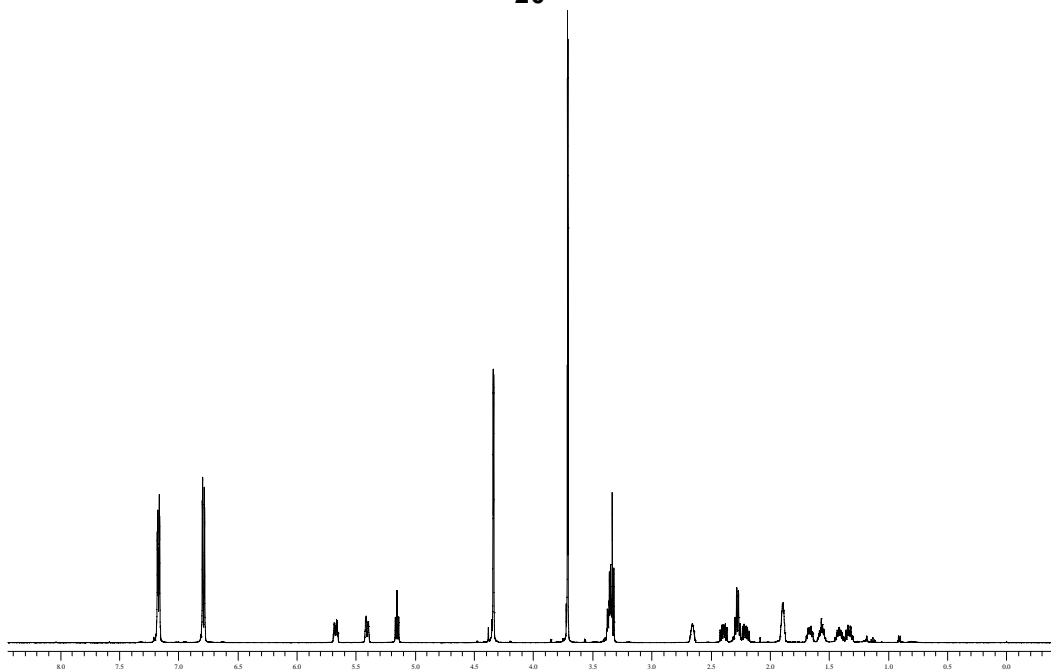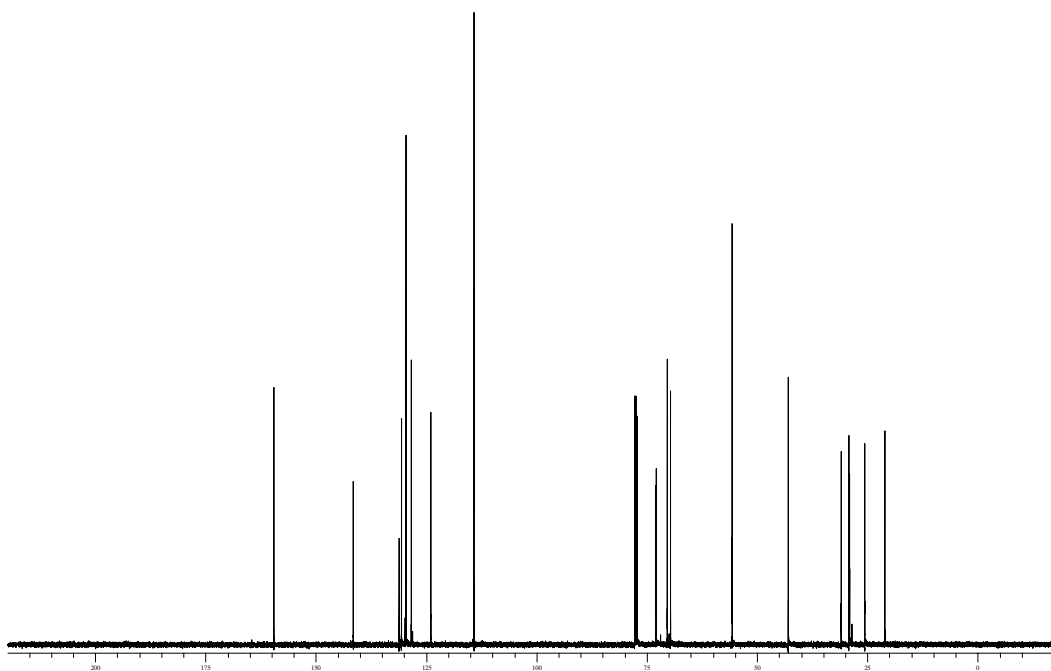

$^1\text{H}$  NMR (500 MHz) and  $^{13}\text{C}$  NMR (126 MHz) of compound **20** ( $\text{CDCl}_3$ )



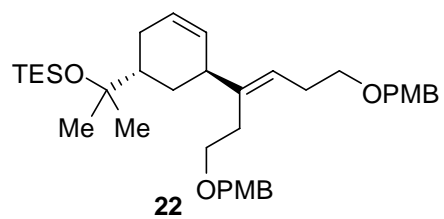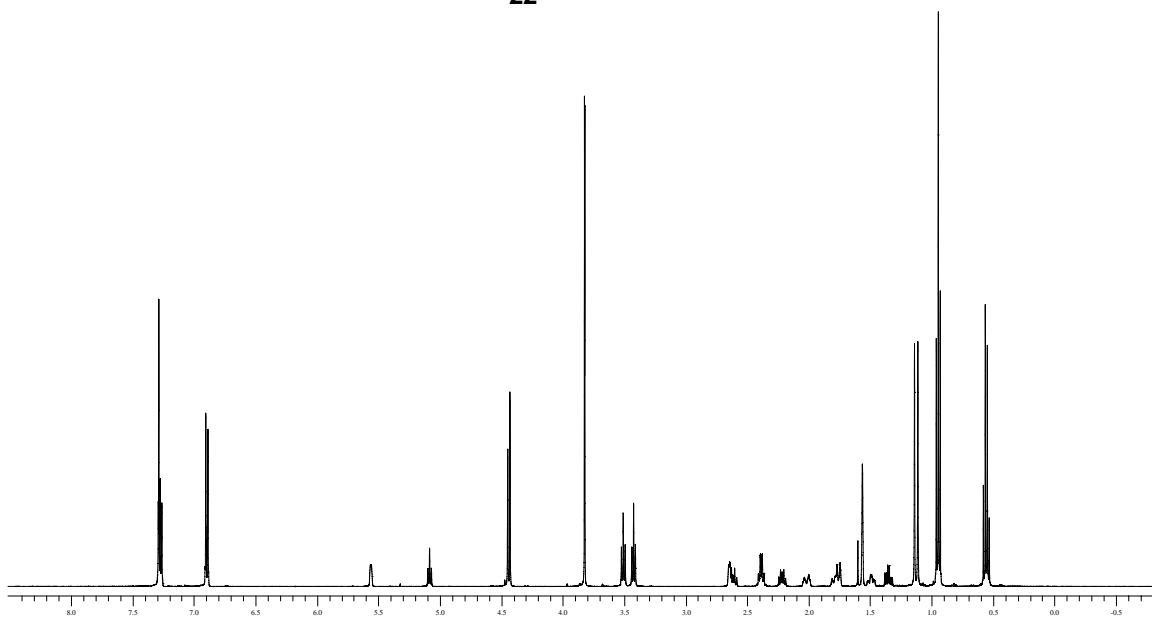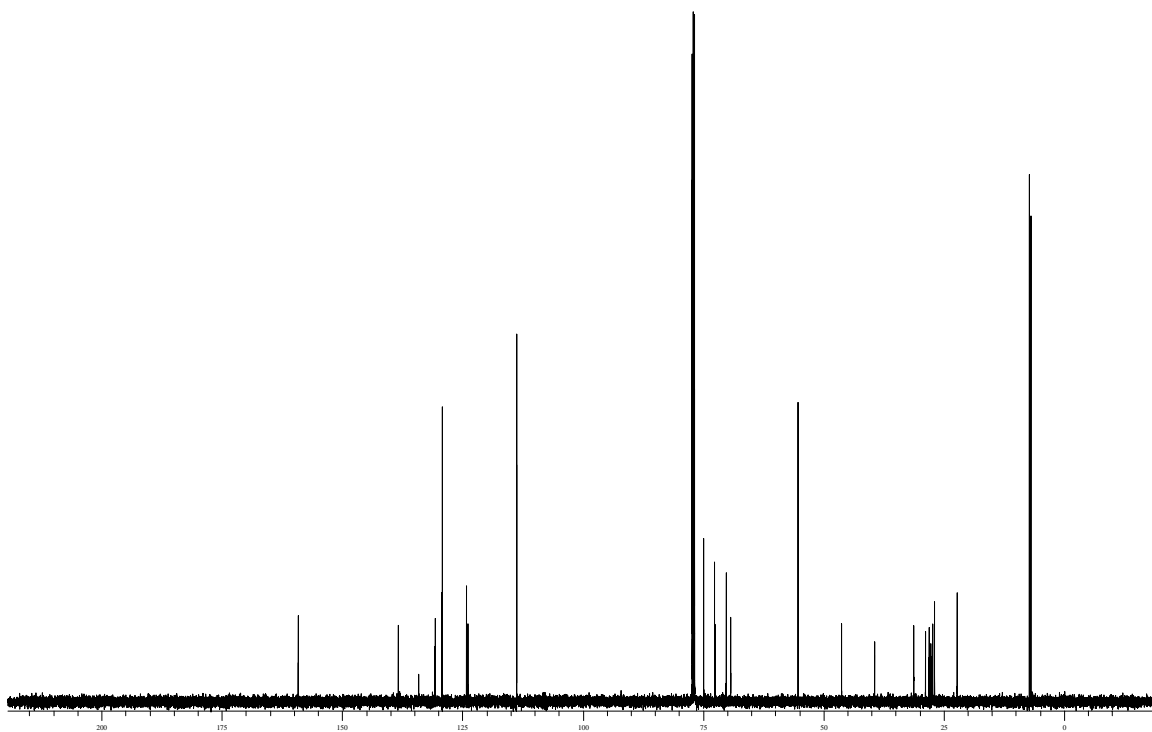

$^1\text{H}$  NMR (500 MHz) and  $^{13}\text{C}$  NMR (126 MHz) of compound **22** ( $\text{CDCl}_3$ )

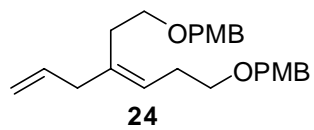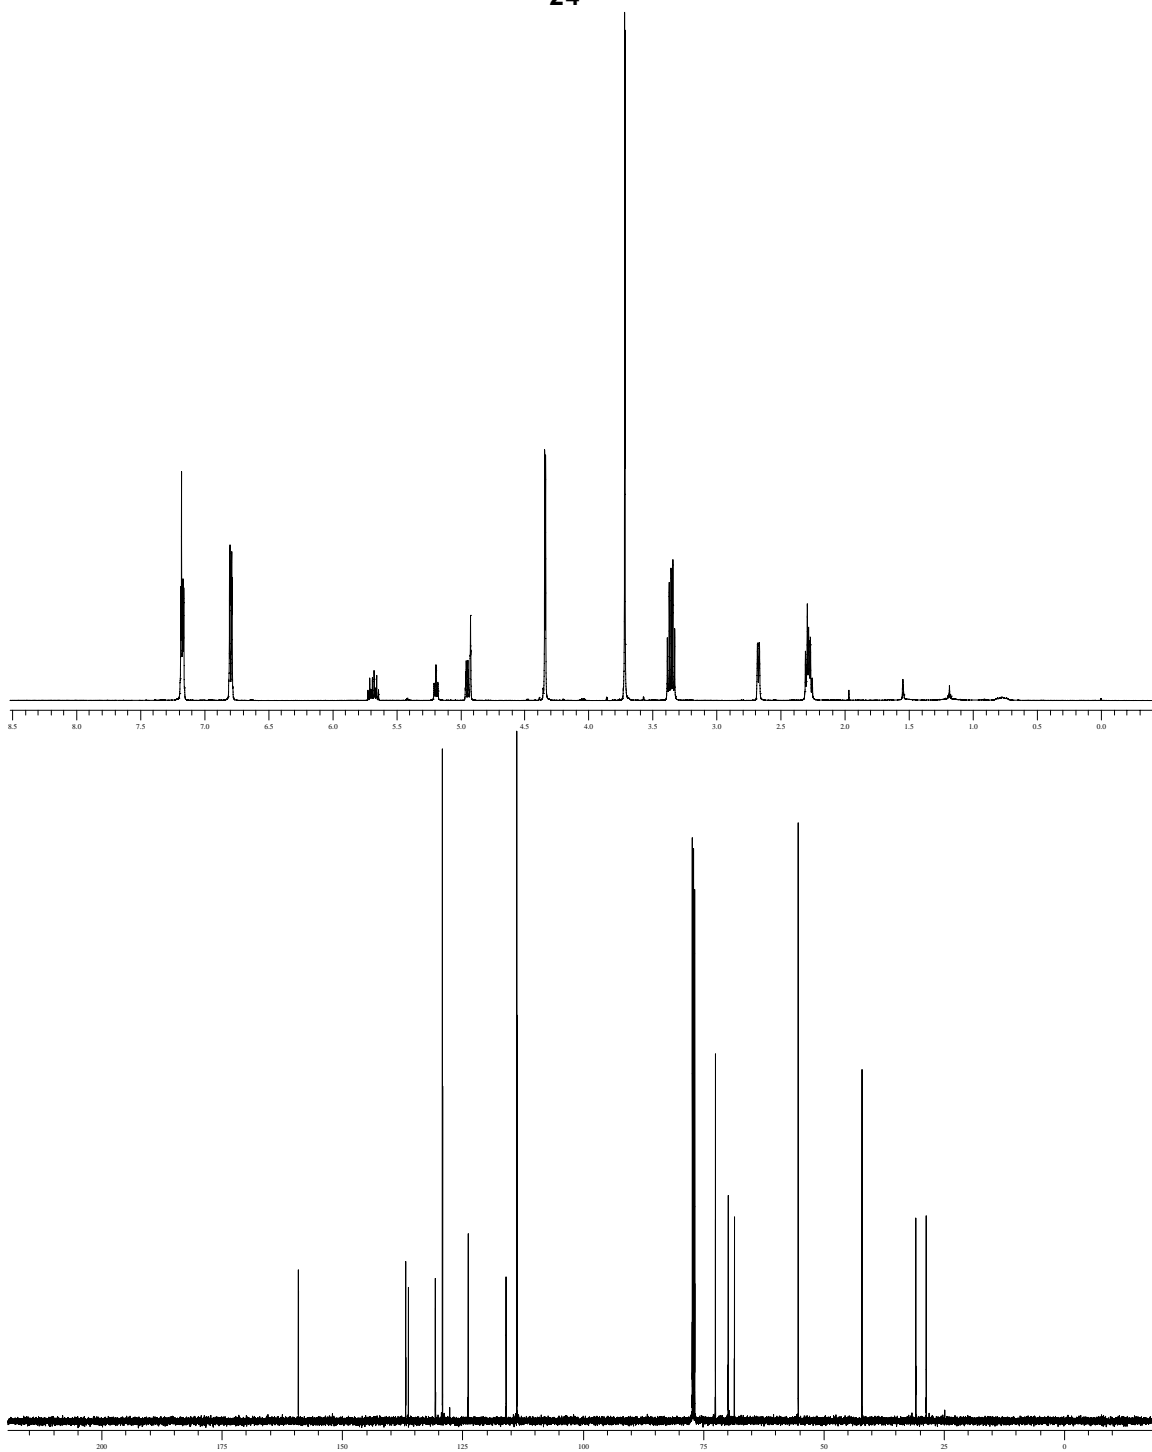

$^1\text{H}$  NMR (500 MHz) and  $^{13}\text{C}$  NMR (126 MHz) of compound **24** ( $\text{CDCl}_3$ )

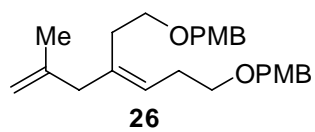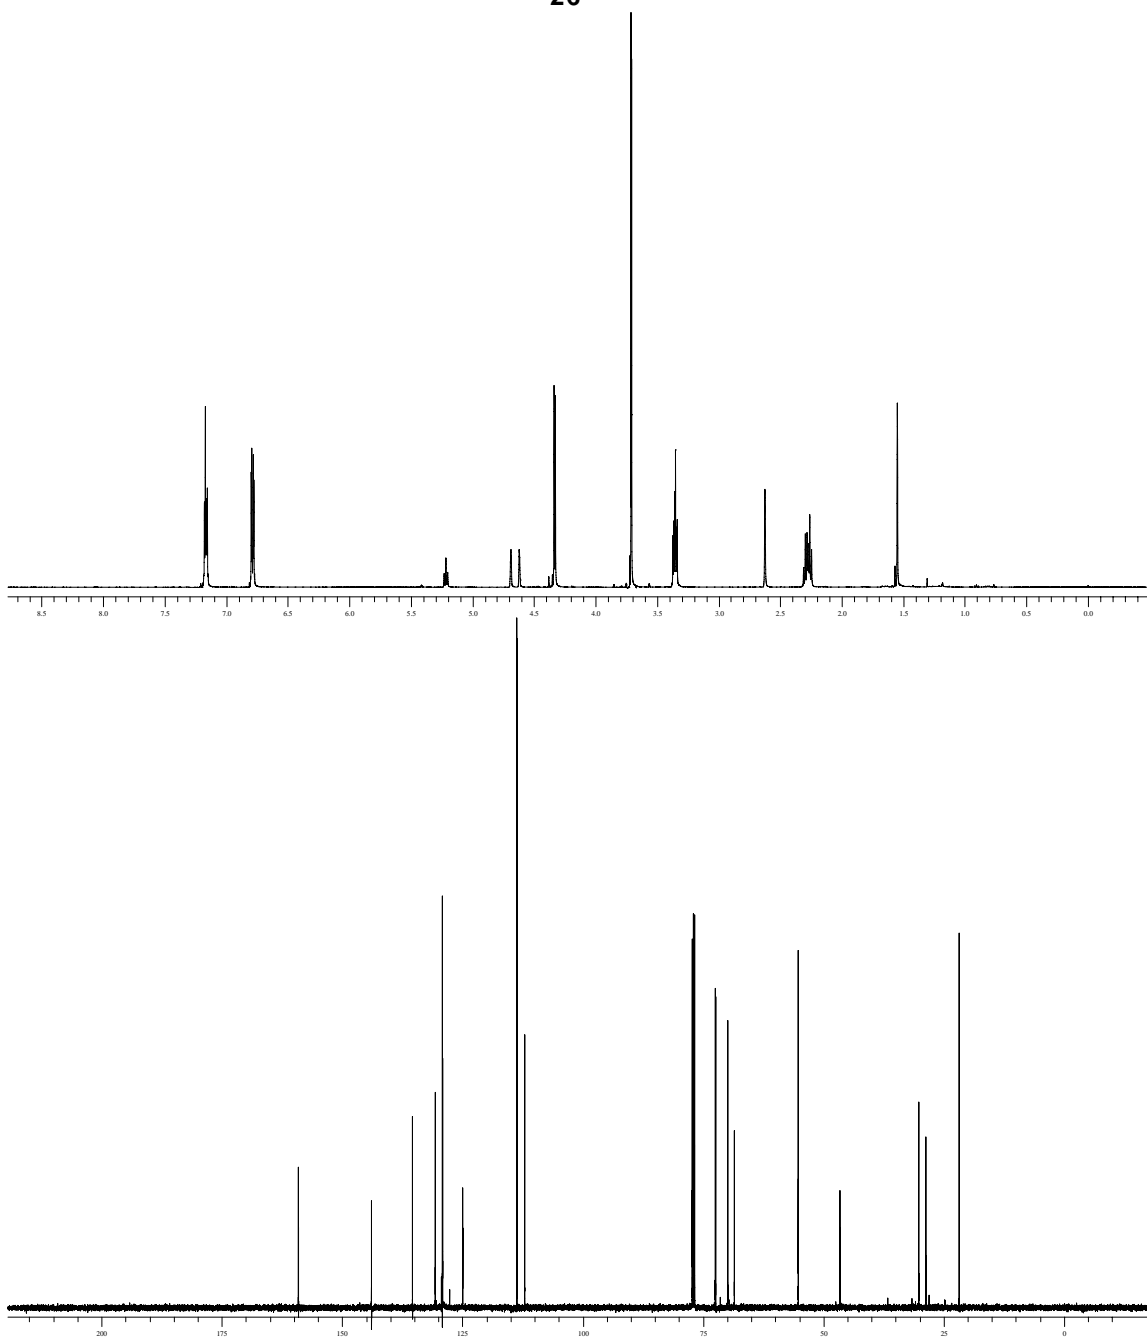

$^1\text{H}$  NMR (500 MHz) and  $^{13}\text{C}$  NMR (126 MHz) of compound **26** ( $\text{CDCl}_3$ )

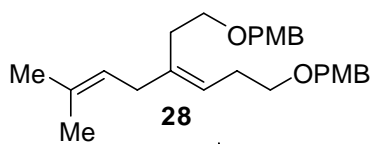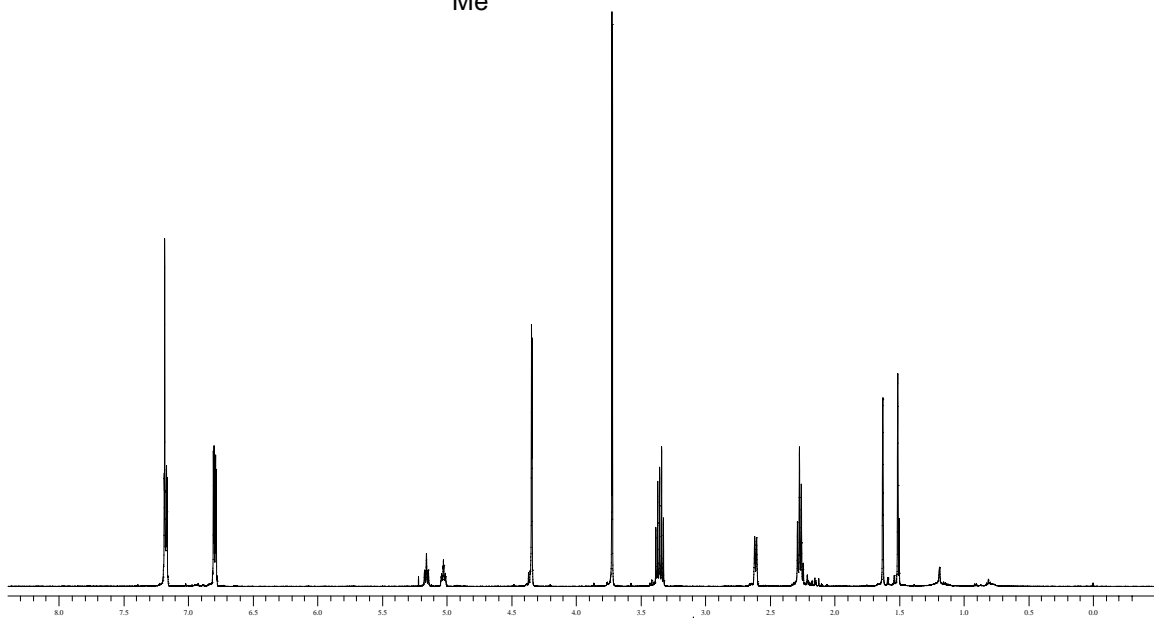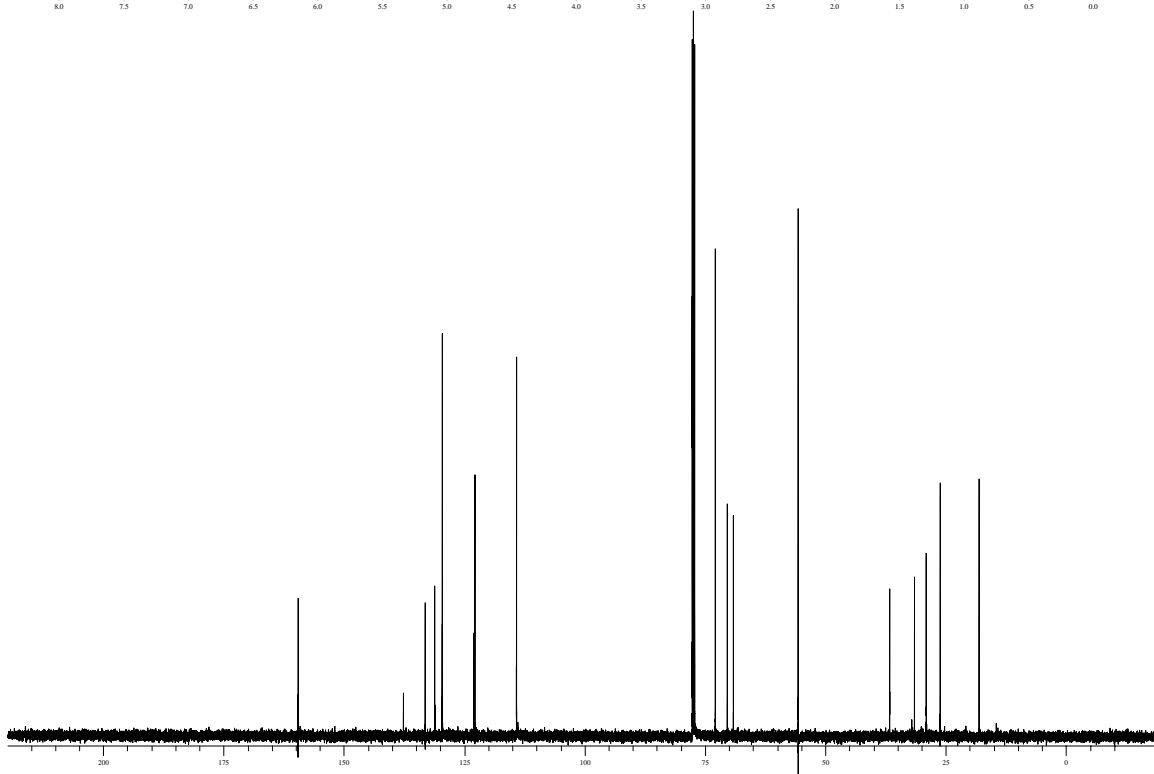

$^1\text{H}$  NMR (400 MHz) and  $^{13}\text{C}$  NMR (100 MHz) of compound **28** ( $\text{CDCl}_3$ )

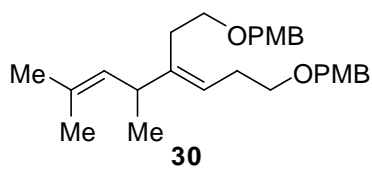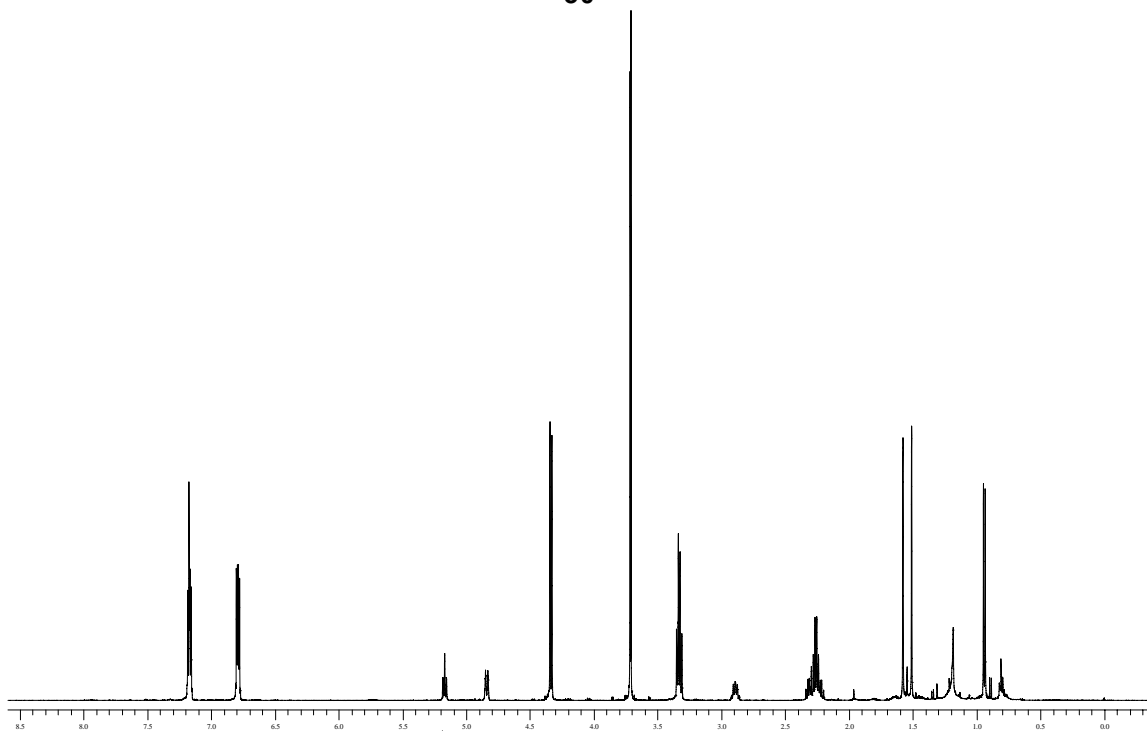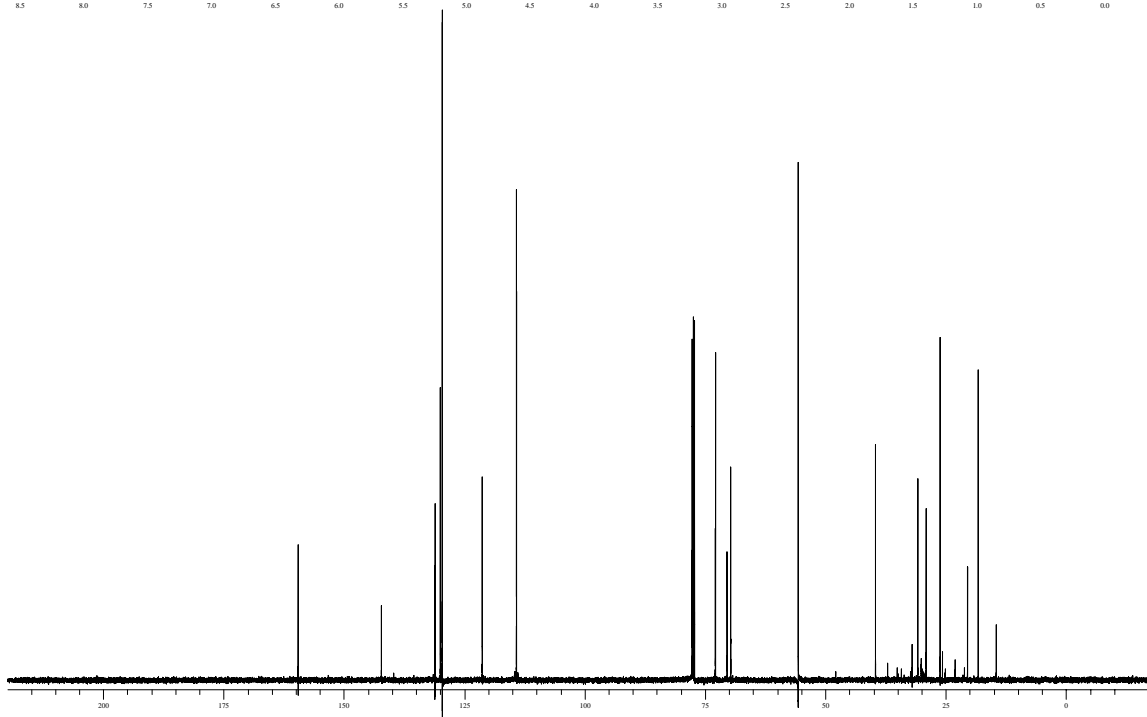

<sup>1</sup>H NMR (500 MHz) and <sup>13</sup>C NMR (126 MHz) of compound **30** (CDCl<sub>3</sub>)

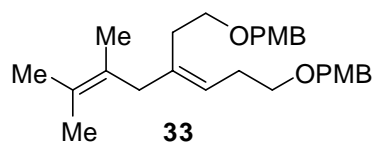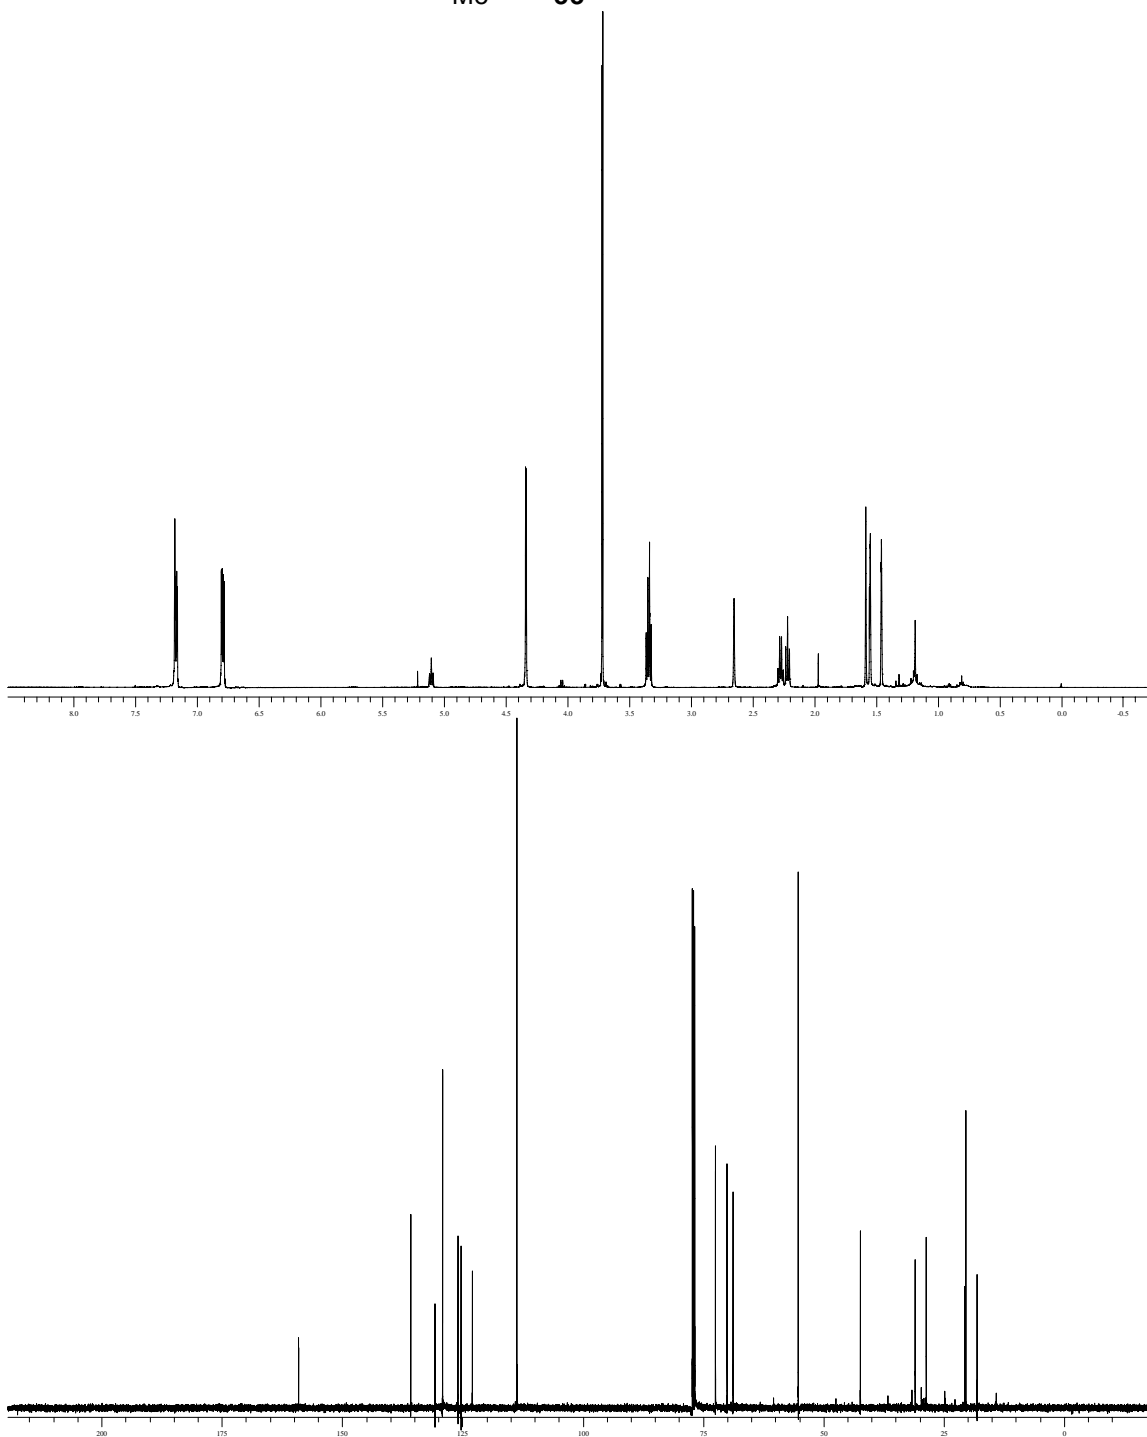

$^1\text{H}$  NMR (500 MHz) and  $^{13}\text{C}$  NMR (126 MHz) of compound **33** ( $\text{CDCl}_3$ )

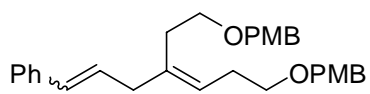

**35**

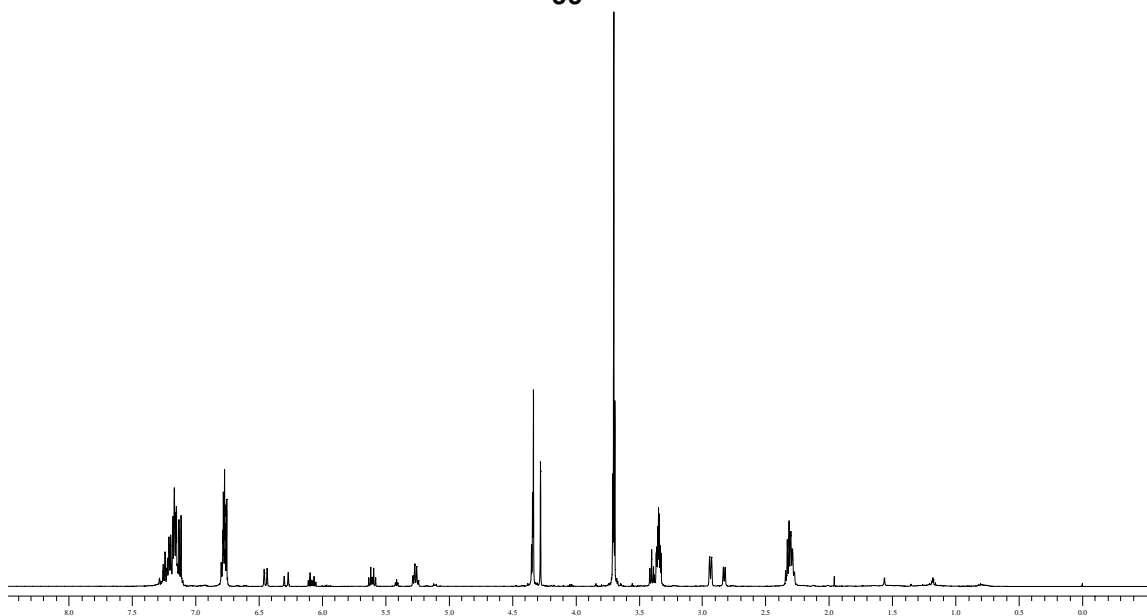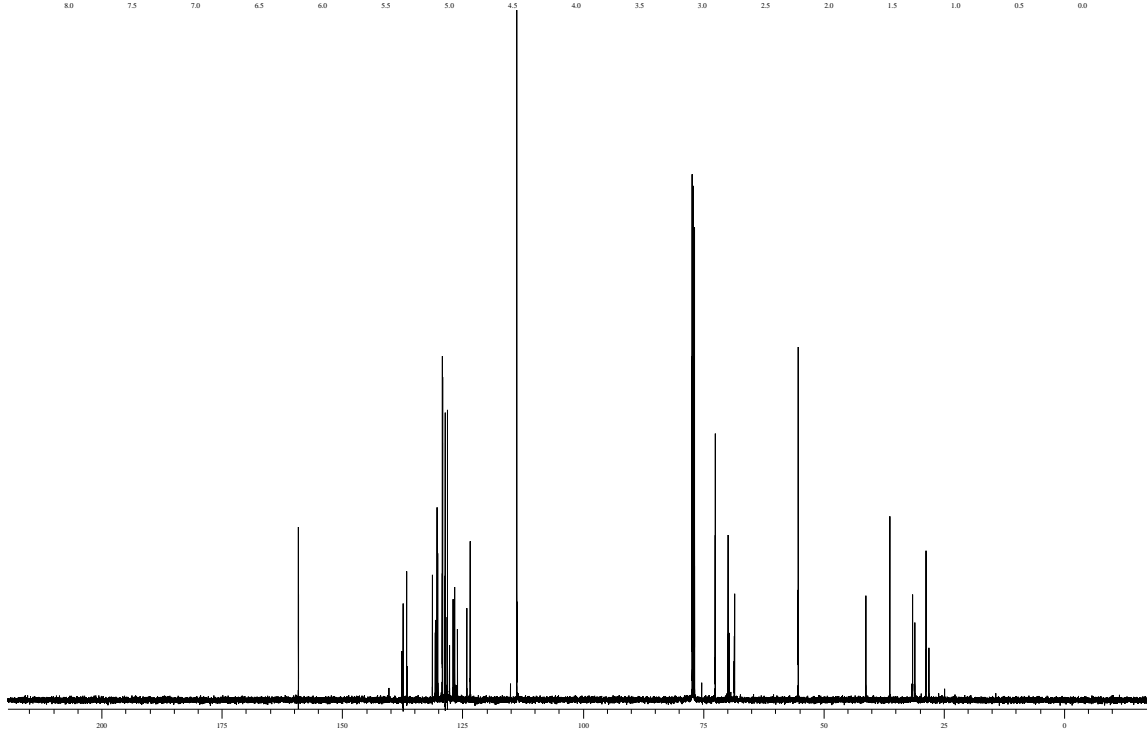

$^1\text{H}$  NMR (500 MHz) and  $^{13}\text{C}$  NMR (126 MHz) of compound **35** ( $\text{CDCl}_3$ )

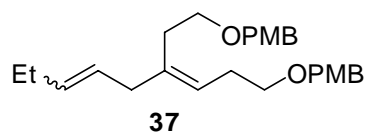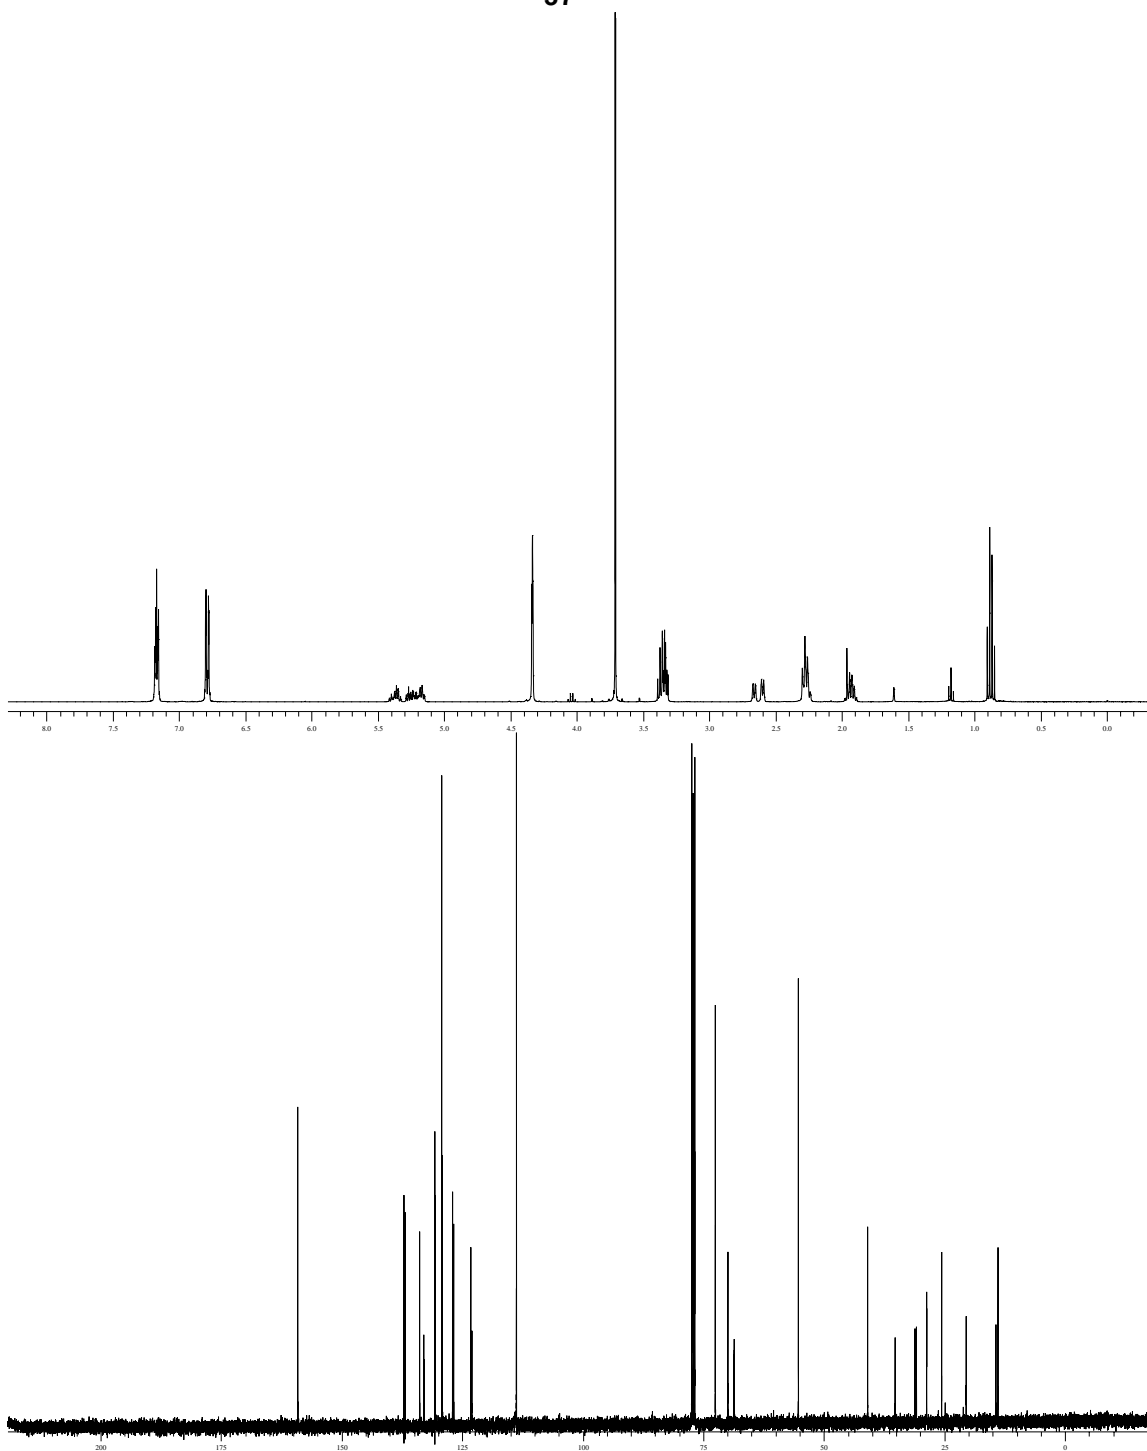

$^1\text{H}$  NMR (400 MHz) and  $^{13}\text{C}$  NMR (100 MHz) of compound **37** ( $\text{CDCl}_3$ )



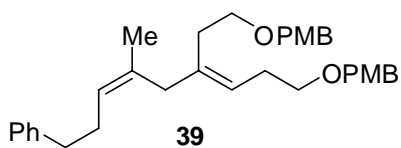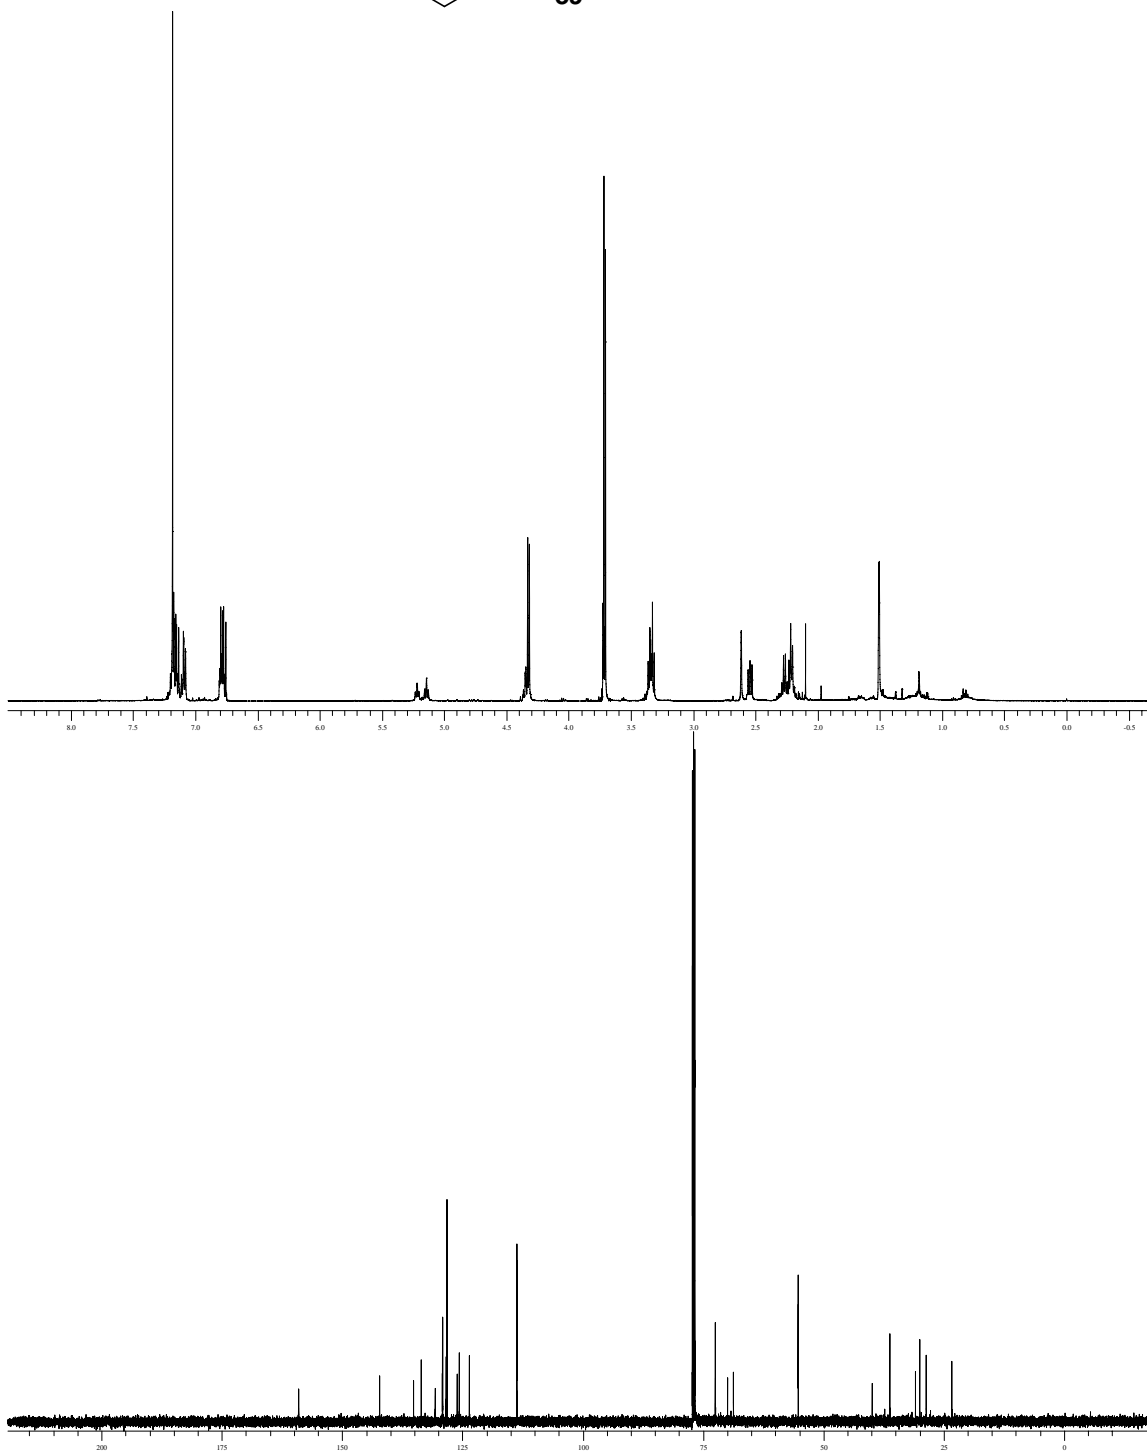

<sup>1</sup>H NMR (400 MHz) and <sup>13</sup>C NMR (100 MHz) of compound **39** (CDCl<sub>3</sub>)

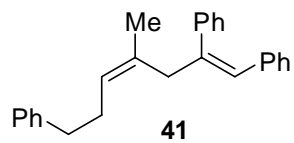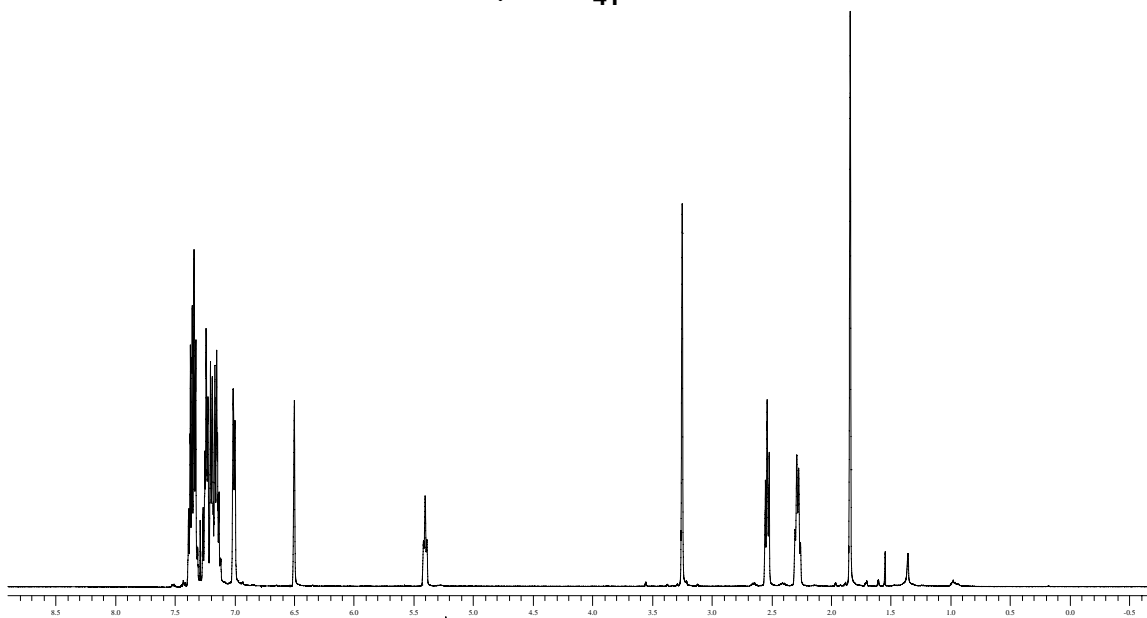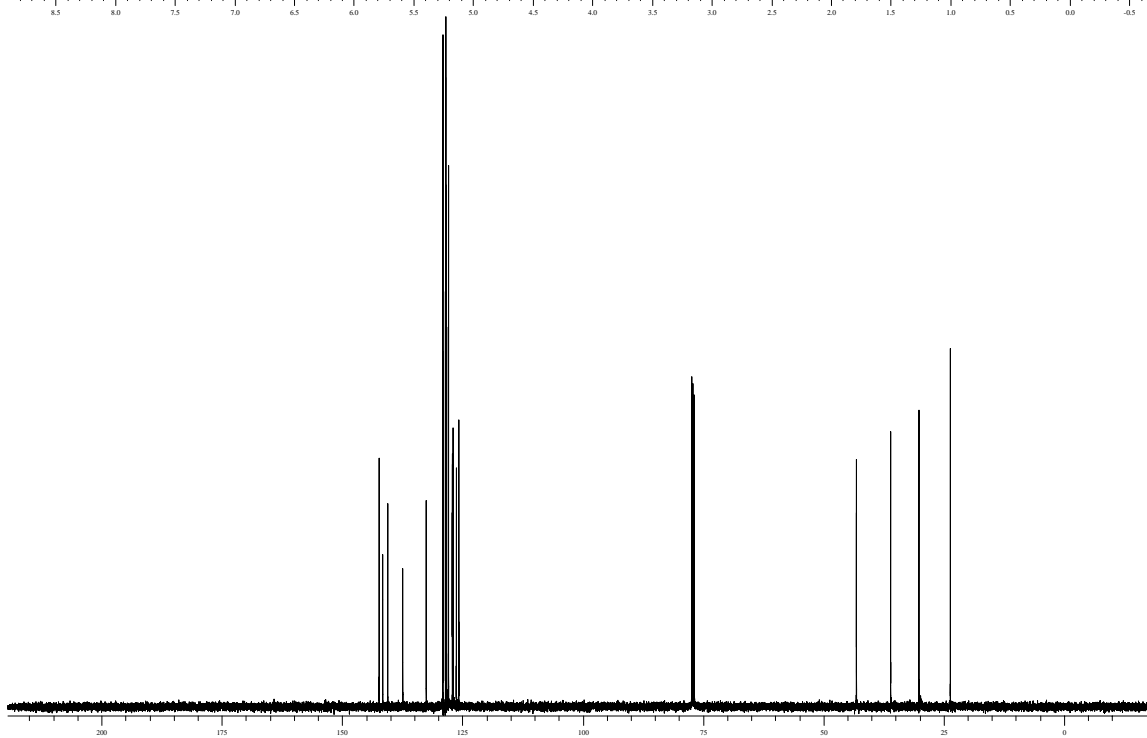

$^1\text{H}$  NMR (500 MHz) and  $^{13}\text{C}$  NMR (126 MHz) of compound **41** ( $\text{CDCl}_3$ )

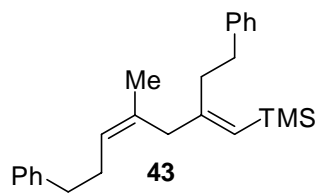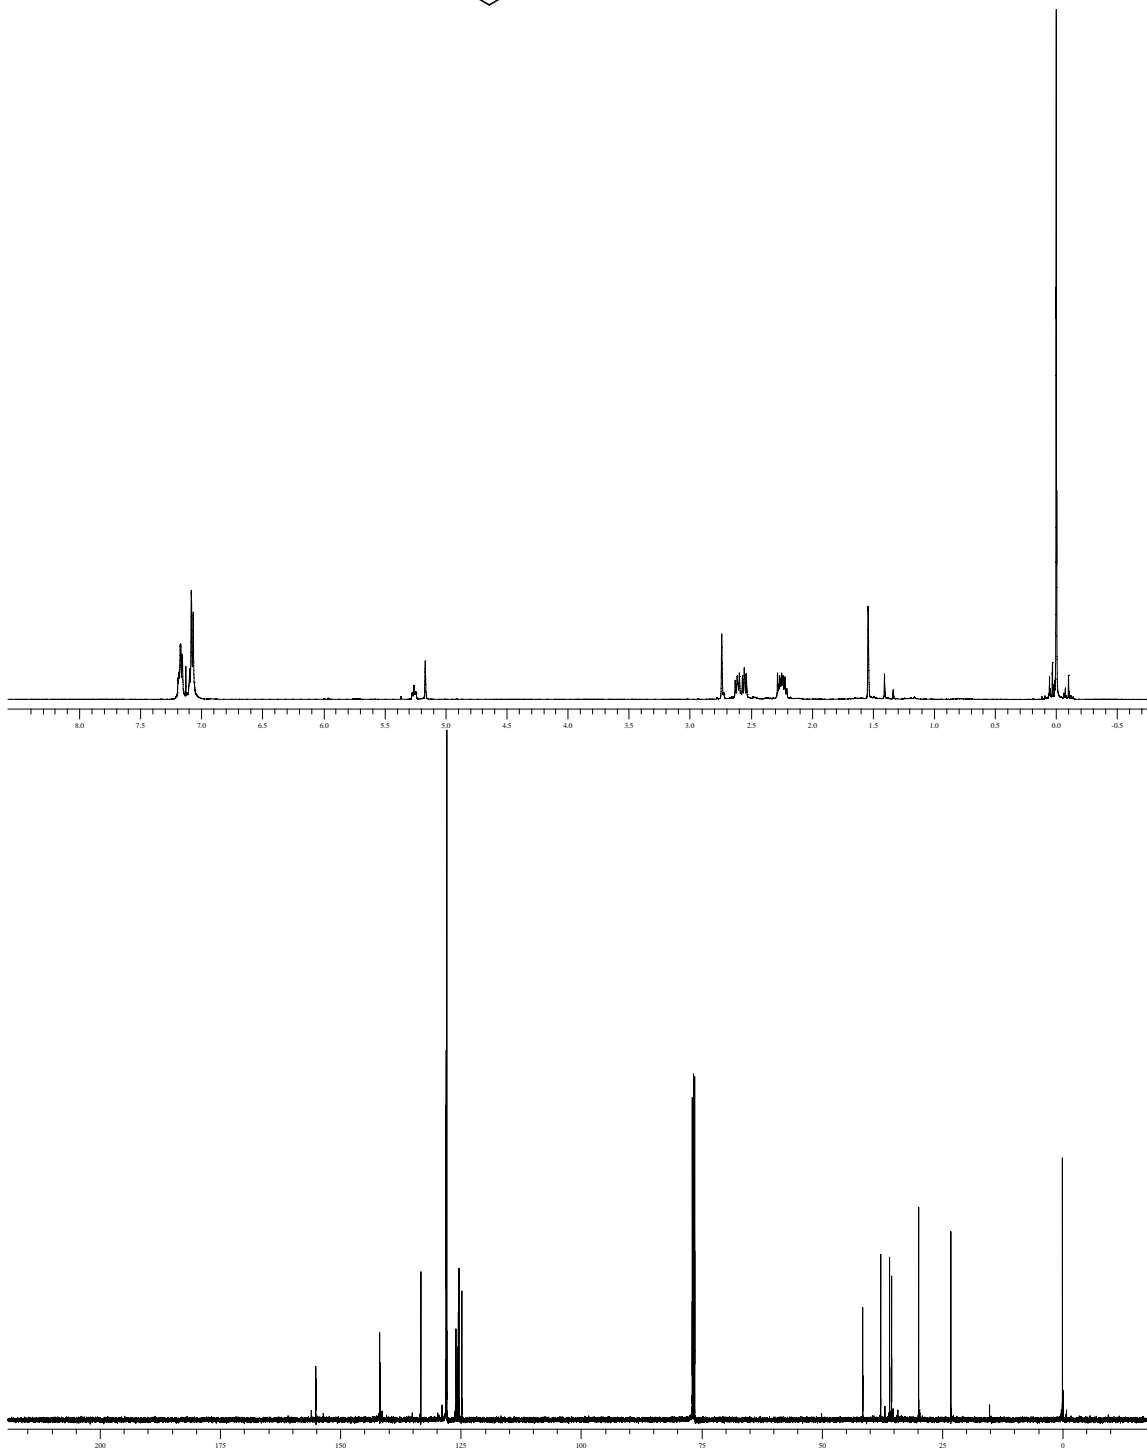

$^1\text{H}$  NMR (500 MHz) and  $^{13}\text{C}$  NMR (126 MHz) of compound **43** ( $\text{CDCl}_3$ )

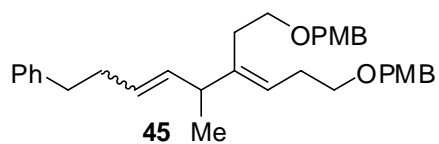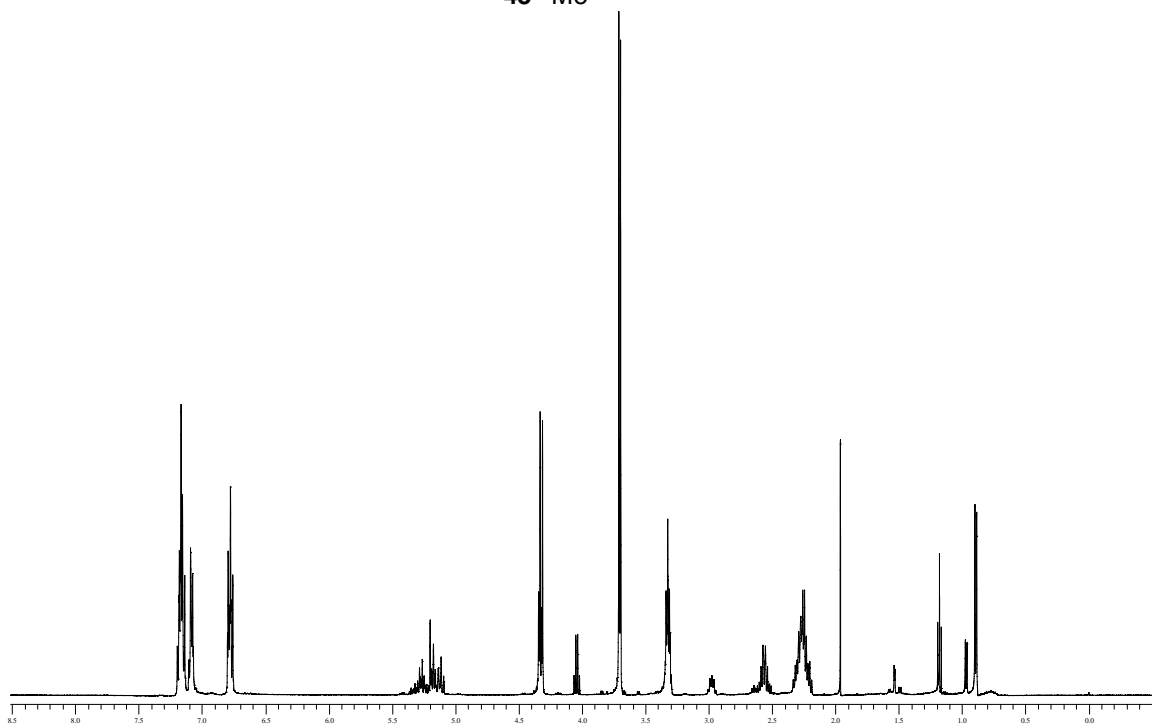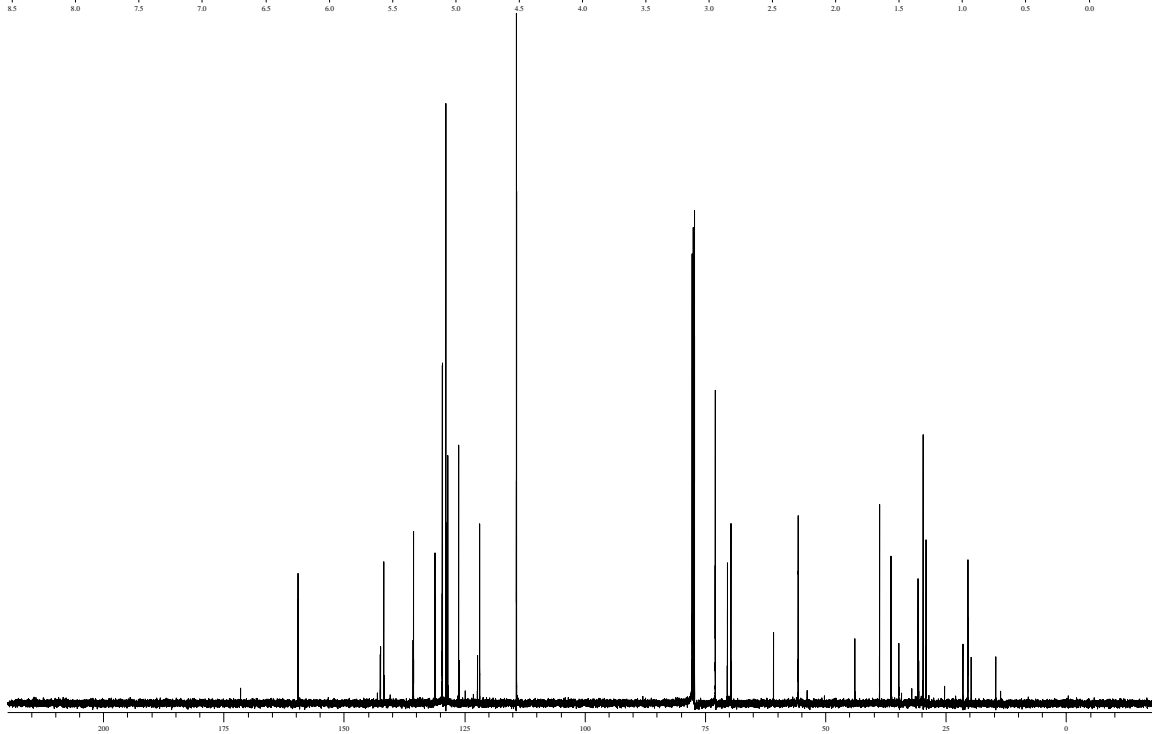

<sup>1</sup>H NMR (500 MHz) and <sup>13</sup>C NMR (126 MHz) of compound **45** (CDCl<sub>3</sub>)

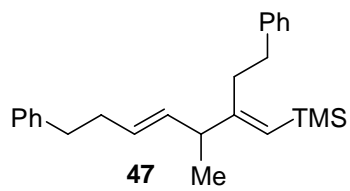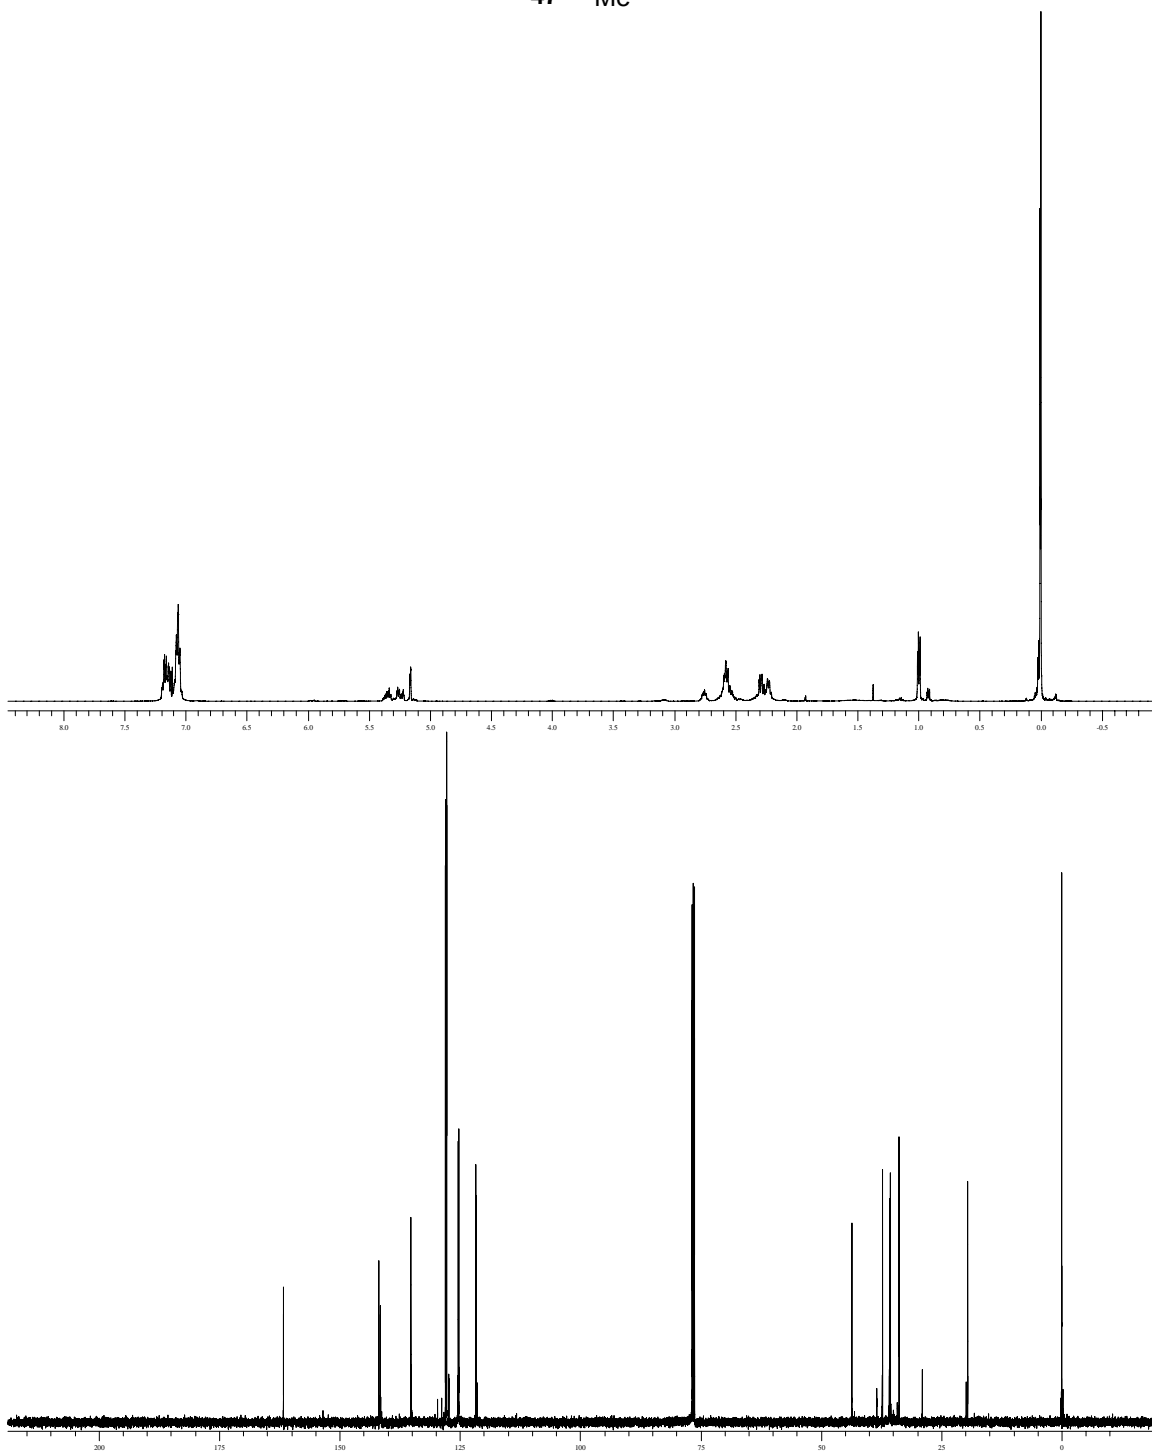

<sup>1</sup>H NMR (400 MHz) and <sup>13</sup>C NMR (100 MHz) of compound **47** (CDCl<sub>3</sub>)

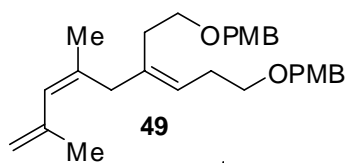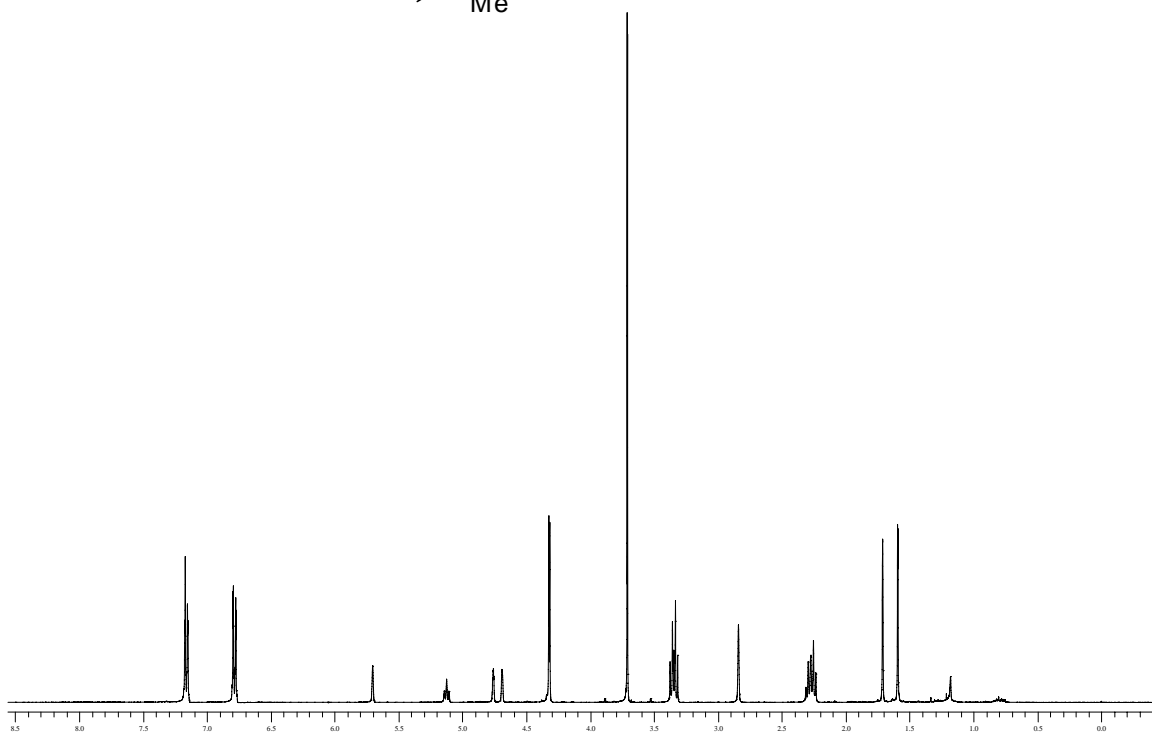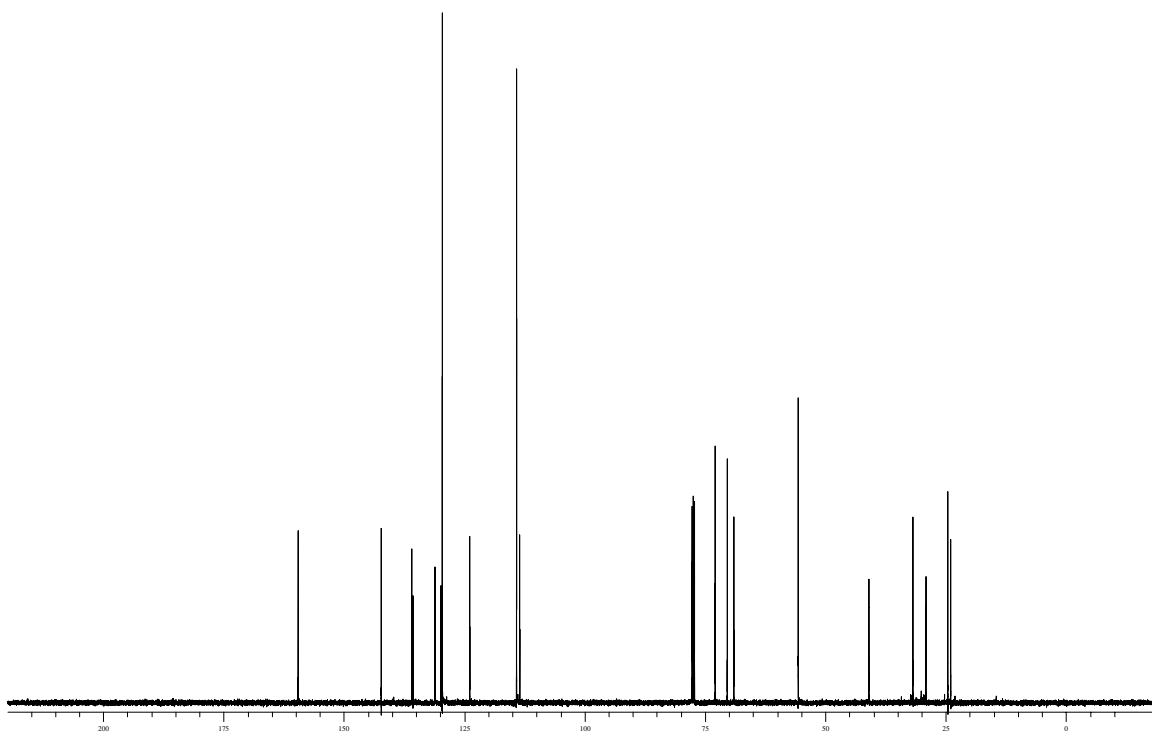

<sup>1</sup>H NMR (400 MHz) and <sup>13</sup>C NMR (100 MHz) of compound **49** (CDCl<sub>3</sub>)
